# Supplementary material for: Generation and validation of a formula to calculate hemoglobin loss on a cohort of healthy adults subjected to controlled blood loss
Source: Springer Nature journal article supplement (doi:10.1186/s12967-021-02783-9), 2021-03-20
Supplement: MOESM2 [file 12967_2021_2783_MOESM2_ESM.pdf]

# Blood loss prediction - Model selection

## Import

```
In [57]: import pandas as pd
import numpy as np

from sklearn.model_selection import train_test_split, KFold, validation_
curve, learning_curve, GridSearchCV
from sklearn.preprocessing import StandardScaler
from sklearn.metrics import mean_squared_error, mean_absolute_error, r2_
score, explained_variance_score
from sklearn.linear_model import LinearRegression, Ridge
from sklearn.tree import DecisionTreeRegressor
from sklearn.ensemble import AdaBoostRegressor, RandomForestRegressor
from sklearn.svm import SVR
from sklearn.neighbors import KNeighborsRegressor

import matplotlib.pyplot as plt
import seaborn as sn

import warnings
warnings.filterwarnings("ignore")
```

## Preprocessing

### Data import

```
In [58]: raw_data = pd.read_excel('Blood_loss_raw_data.xlsx')
raw_data['BMI'] = raw_data['weight']/((raw_data['height']/100)**2)
raw_data.drop(['VU_Eisen', 'VU_Ferritin', 'loss_eryl'], inplace=True, ax
is=1)
raw_data.dropna(inplace=True)
raw_data.reset_index(inplace=True)
raw_data
```

```
Out[58]:
```

|  | index | weight | sex  | height | age | HB_pre | HB_post | HCT_pre | HCT_post | BBS1PLT |     |
|--|-------|--------|------|--------|-----|--------|---------|---------|----------|---------|-----|
|  | 0     | 143.0  | 1    | 184    | 30  | 16.8   | 15.0    | 46.4    | 41.9     | 199     |     |
|  | 1     | 88.0   | 1    | 185    | 38  | 14.5   | 12.2    | 40.6    | 34.4     | 257     |     |
|  | 2     | 75.0   | 0    | 175    | 40  | 14.4   | 12.7    | 40.9    | 35.7     | 276     |     |
|  | 3     | 105.0  | 1    | 186    | 44  | 16.0   | 13.7    | 45.6    | 39.2     | 243     |     |
|  | 4     | 88.0   | 0    | 178    | 33  | 12.8   | 12.2    | 36.6    | 34.6     | 214     |     |
|  | ...   | ...    | ...  | ...    | ... | ...    | ...     | ...     | ...      | ...     |     |
|  | 394   | 397    | 86.0 | 1      | 190 | 40     | 14.0    | 11.0    | 43.6     | 33.8    | 293 |

|     |     |       |   |     |    |      |      |      |      |     |
|-----|-----|-------|---|-----|----|------|------|------|------|-----|
| 395 | 398 | 93.0  | 1 | 180 | 56 | 15.6 | 12.0 | 43.9 | 34.0 | 231 |
| 396 | 399 | 102.0 | 1 | 181 | 24 | 16.2 | 12.5 | 46.4 | 35.6 | 271 |
| 397 | 400 | 87.0  | 1 | 189 | 24 | 15.0 | 11.1 | 41.6 | 30.7 | 286 |
| 398 | 401 | 95.0  | 1 | 180 | 25 | 14.8 | 14.8 | 41.4 | 41.7 | 231 |

399 rows x 18 columns

## Data transformation & visualizations

```
In [62]: # decorrelation of variables
raw_data_temp = raw_data[['weight', 'age', 'height', 'HB_pre', 'HB_post',
', 'HCT_pre', 'HCT_post', 'BBS1PLT', 'BBS1LEUCO', 'loss_g']]
raw_data_temp = raw_data_temp.rename(columns={"BBS1PLT": "PLT_pre", 'BB
S1LEUCO': 'LEUCO_pre', 'loss_g': 'HB_loss'})
cm = raw_data_temp.corr().round(2)
sn.heatmap(cm, annot=False, cmap='Reds', fmt='.2g')
plt.show()
```

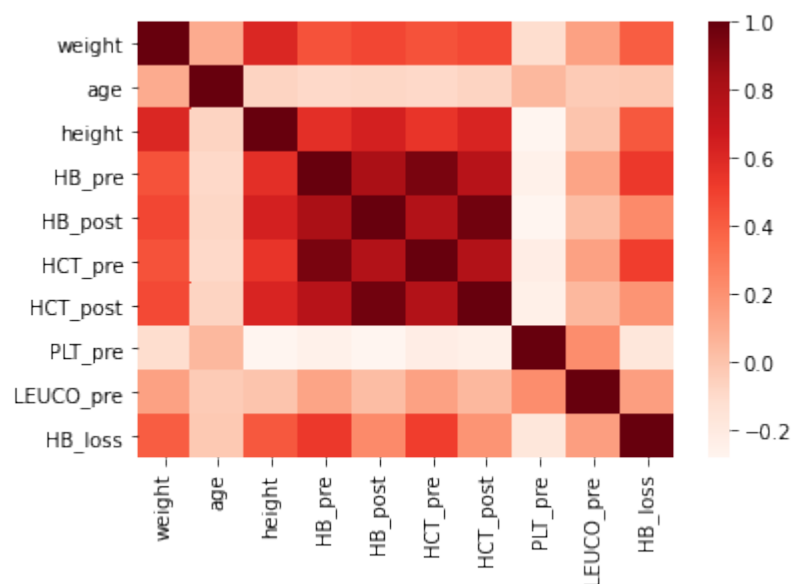

```
In [11]: print('Quotient of HCT and HB: {}'.format((sum(raw_data['HCT_pre'])+sum
(raw_data['HCT_post']))/(sum(raw_data['HB_pre'])+sum(raw_data['HB_post']
))))))
```

Quotient of HCT and HB: 2.870124945665747

```
In [12]: # replace HB_post by HB_diff
raw_data['HB_diff'] = raw_data['HB_post'] - raw_data['HB_pre']
raw_data.drop('HB_post', inplace=True, axis=1)

# correct HCT by HB and calculate difference
raw_data['HCT_diff'] = (raw_data['HCT_post'] - raw_data['HCT_pre'])/2.8
7 - raw_data['HB_diff']
raw_data['HCT_pre'] = raw_data['HCT_pre']/2.87 - raw_data['HB_pre']
raw_data.drop('HCT_post', inplace=True, axis=1)

# dropt BBS4PLT and BBS4LEUCO2 by difference
raw_data.drop(['BBS4PLT', 'BBS4LEUCO2'], inplace=True, axis=1)
```

```
In [13]: # check correlation matrix
raw_data_temp = raw_data[['HB_pre', 'HB_diff', 'HCT_pre', 'HCT_diff', 'BBS1PLT', 'BBS1LEUCO']]
cm = raw_data_temp.corr()
sn.heatmap(cm, annot=True, cmap='Reds', fmt='.2g')
plt.show()
```

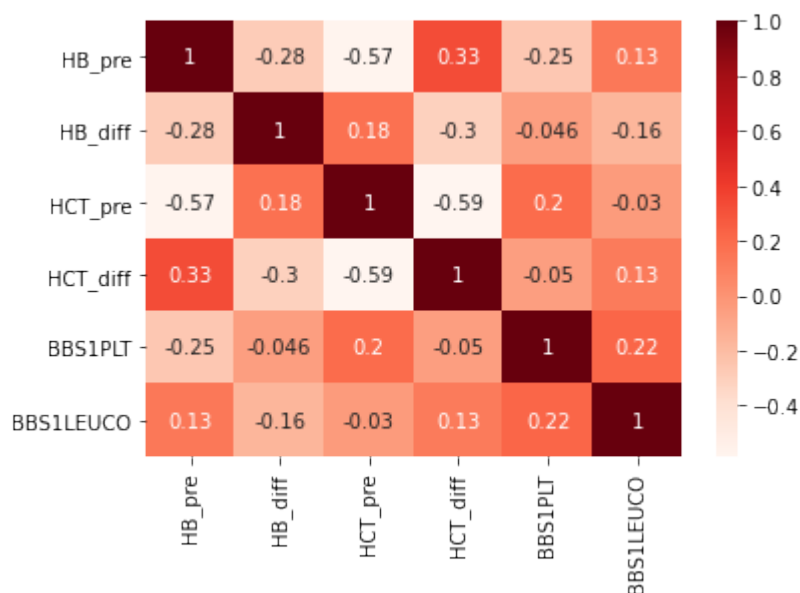

```
In [14]: # weight
raw_data['weight'].plot.hist(grid=True, bins=20, rwidth=0.9, color='#607c8e')
plt.title('Distribution of weight')
# to be log transformed
```

Out[14]: Text(0.5, 1.0, 'Distribution of weight')

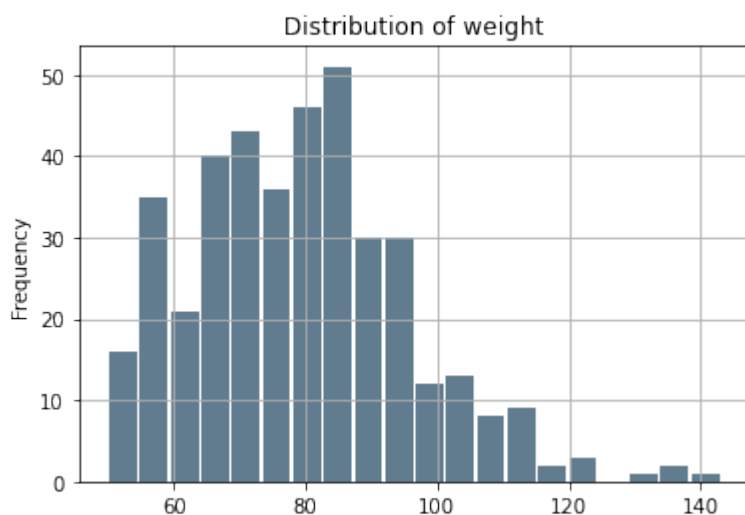

```
In [15]: # height
raw_data['height'].plot.hist(grid=True, bins=20, rwidth=0.9, color='#607c8e')
plt.title('Distribution of height')
```

Out[15]: Text(0.5, 1.0, 'Distribution of height')

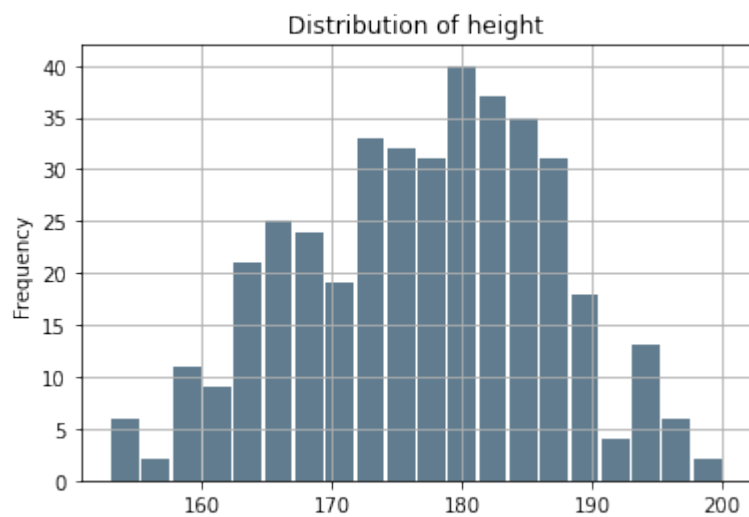

```
In [16]: # BMI
raw_data['BMI'].plot.hist(grid=True, bins=20, rwidth=0.9, color='#607c8e')
plt.title('Distribution of BMI')
# to be log transformed
```

Out[16]: Text(0.5, 1.0, 'Distribution of BMI')

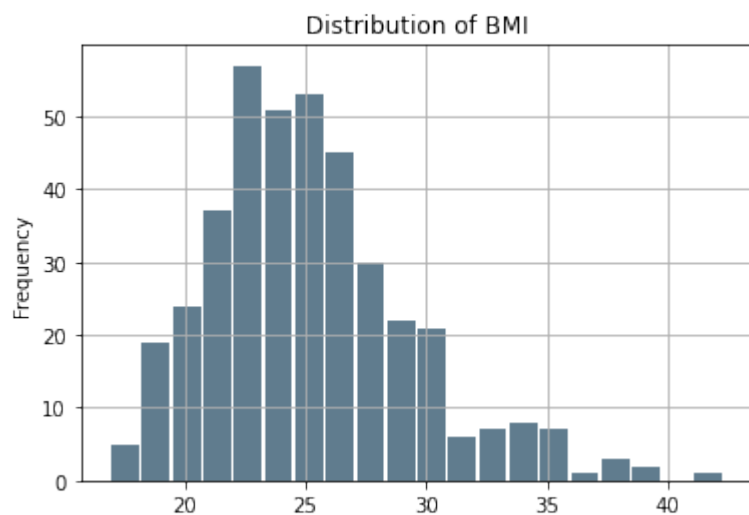

```
In [17]: # age
raw_data['age'].plot.hist(grid=True, bins=20, rwidth=0.9, color='#607c8e')
plt.title('Distribution of age')
# to be log transformed
```

Out[17]: Text(0.5, 1.0, 'Distribution of age')

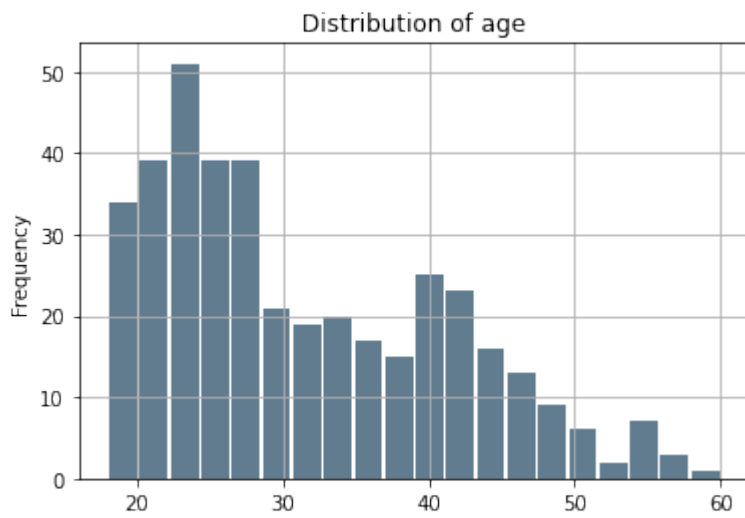

```
In [18]: # HB_pre
raw_data['HB_pre'].plot.hist(grid=True, bins=20, rwidth=0.9, color='#607c8e')
plt.title('Distribution of HB_pre')
```

Out[18]: Text(0.5, 1.0, 'Distribution of HB\_pre')

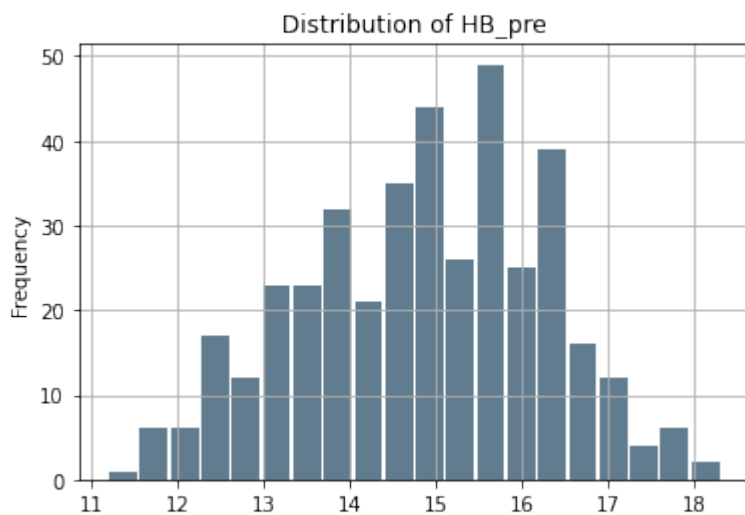

```
In [19]: # HB_diff
raw_data['HB_diff'].plot.hist(grid=True, bins=20, rwidth=0.9, color='#607c8e')
plt.title('Distribution of HB_diff')
```

Out[19]: Text(0.5, 1.0, 'Distribution of HB\_diff')

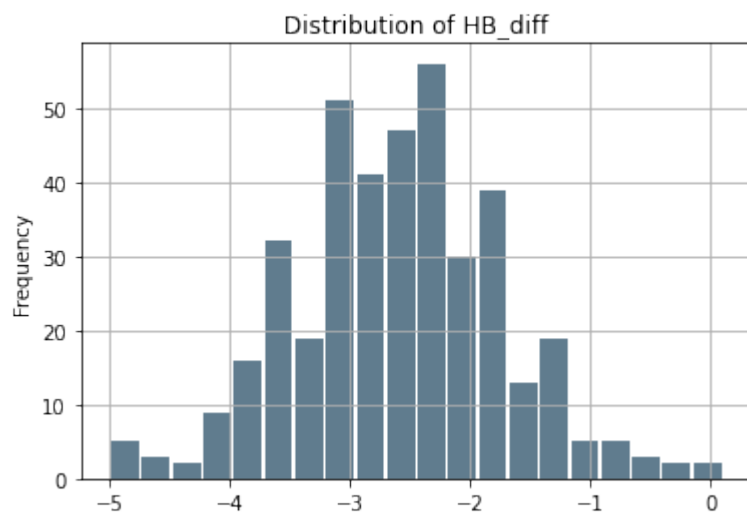

```
In [20]: # HCT_pre
raw_data['HCT_pre'].plot.hist(grid=True, bins=20, rwidth=0.9, color='#607c8e')
plt.title('Distribution of HCT_pre')
```

Out[20]: Text(0.5, 1.0, 'Distribution of HCT\_pre')

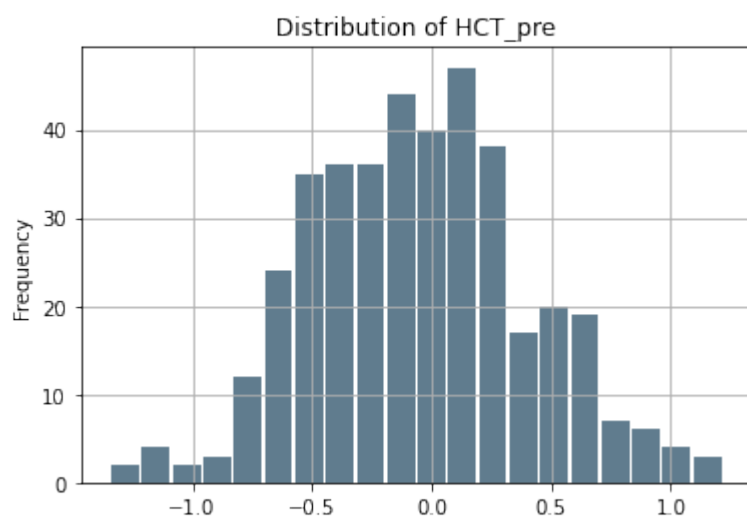

```
In [21]: # HCT_diff
raw_data['HCT_diff'].plot.hist(grid=True, bins=20, rwidth=0.9, color='#607c8e')
plt.title('Distribution of HCT_diff')
```

Out[21]: Text(0.5, 1.0, 'Distribution of HCT\_diff')

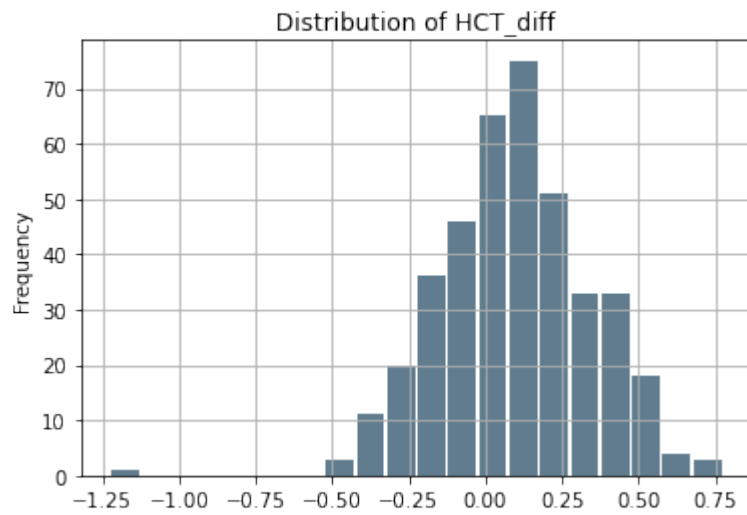

```
In [22]: # BBS1PLT
raw_data['BBS1PLT'].plot.hist(grid=True, bins=20, rwidth=0.9, color='#607c8e')
plt.title('Distribution of BBS1PLT')
```

Out[22]: Text(0.5, 1.0, 'Distribution of BBS1PLT')

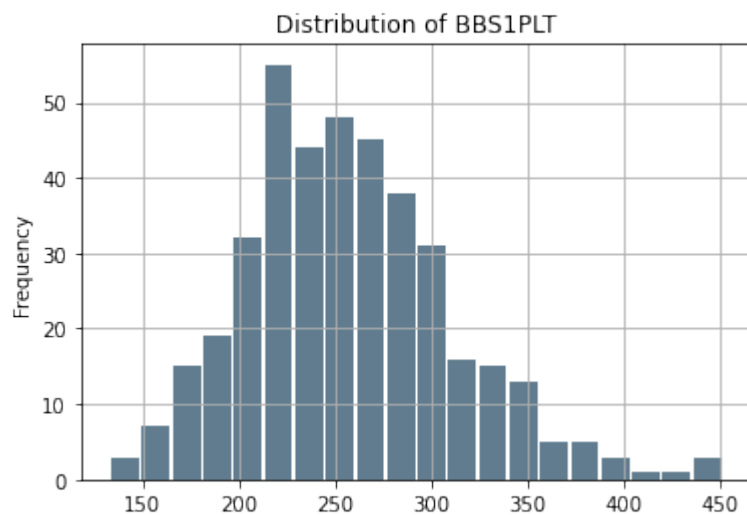

```
In [23]: # BBS1LEUCO
raw_data['BBS1LEUCO'].plot.hist(grid=True, bins=20, rwidth=0.9, color='#607c8e')
plt.title('Distribution of BBS1LEUCO')
# to be log-transformed
```

Out[23]: Text(0.5, 1.0, 'Distribution of BBS1LEUCO')

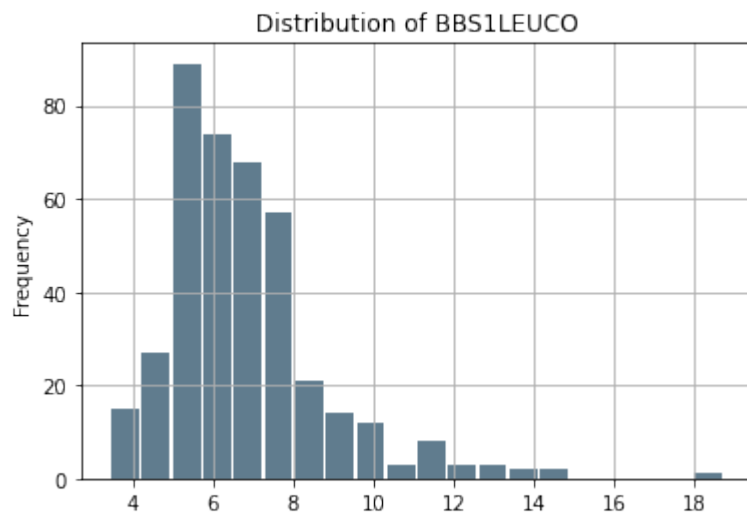

```
In [24]: # Nadler
raw_data['Nadler'].plot.hist(grid=True, bins=20, rwidth=0.9, color='#607c8e')
plt.title('Distribution of Nadler')
```

Out[24]: Text(0.5, 1.0, 'Distribution of Nadler')

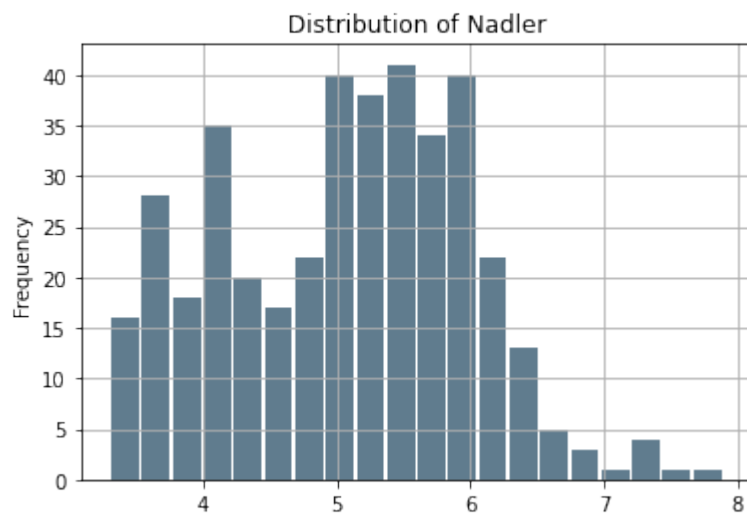

```
In [25]: # Nadler * HB_diff
raw_data['BV_HB'].plot.hist(grid=True, bins=20, rwidth=0.9, color='#607c8e')
plt.title('Distribution of BV_HB')
```

Out[25]: Text(0.5, 1.0, 'Distribution of BV\_HB')



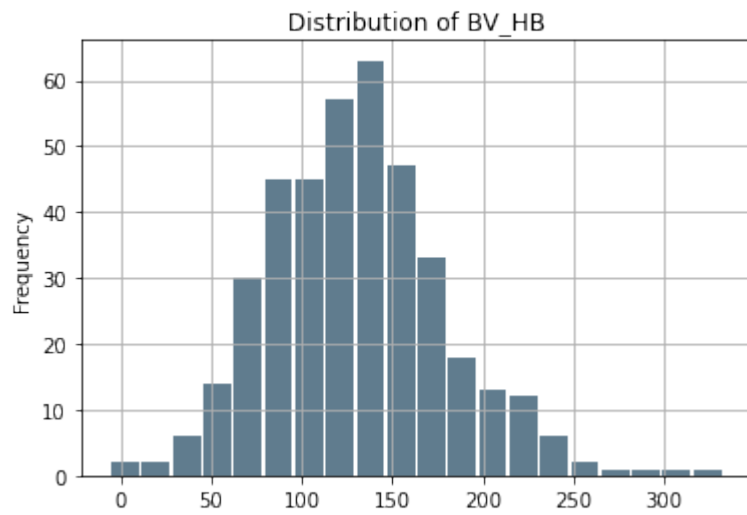

```
In [26]: # blood loss (g)
raw_data['loss_g'].plot.hist(grid=True, bins=20, rwidth=0.9, color='#607c8e')
plt.title('Distribution of blood_loss (g)')
```

Out[26]: Text(0.5, 1.0, 'Distribution of blood\_loss (g)')

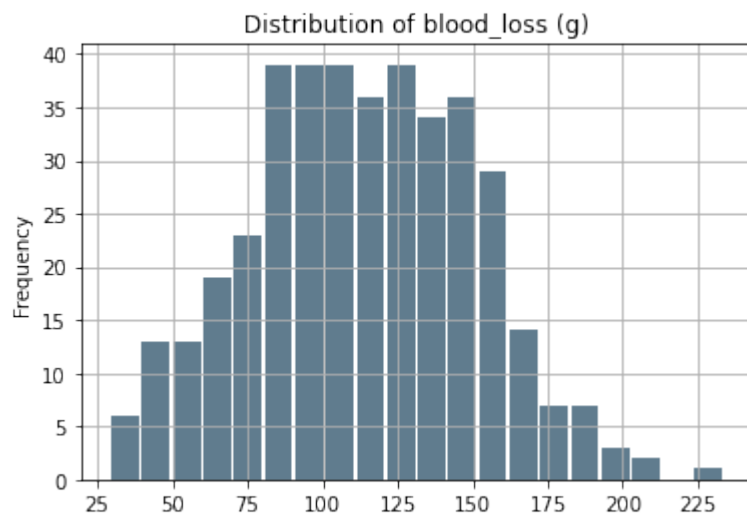

```
In [27]: # blood loss (ml)
raw_data['loss_ml'].plot.hist(grid=True, bins=20, rwidth=0.9, color='#607c8e')
plt.title('Distribution of blood_loss (ml)')
```

Out[27]: Text(0.5, 1.0, 'Distribution of blood\_loss (ml)')

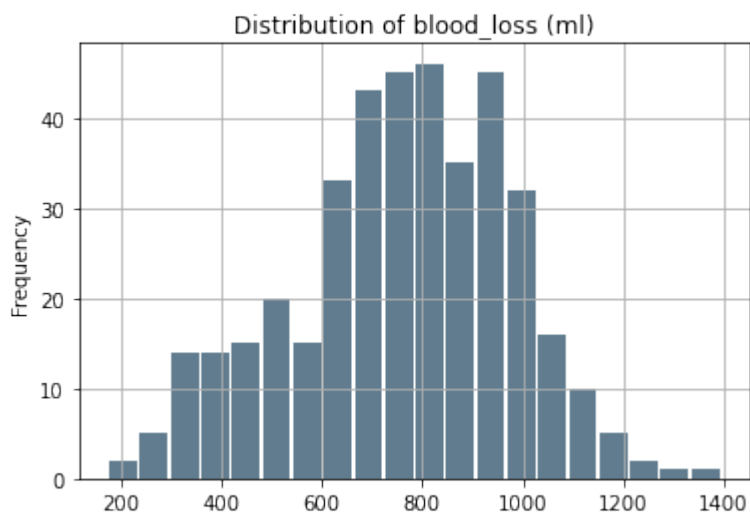

## Data transformations

```
In [28]: # log transformations
raw_data['weight'] = np.log(raw_data['weight'])
raw_data['age'] = np.log(raw_data['age'])
raw_data['BMI'] = np.log(raw_data['BMI'])
raw_data['BBS1LEUCO'] = np.log(raw_data['BBS1LEUCO'])

# split into training and testing set
y = raw_data['loss_g']
X = raw_data.drop(['loss_g', 'loss_ml'], axis=1)
X_train_all, X_test_all, y_train, y_test = train_test_split(X, y, test_
size=0.25, random_state=1)

X_train_med = pd.DataFrame(X_train_all['BV_HB'])
X_test_med = pd.DataFrame(X_test_all['BV_HB'])
X_train = X_train_all[['weight', 'sex', 'height', 'BMI', 'age', 'HB_pre
', 'HCT_pre', 'HCT_diff', 'BBS1PLT', 'BBS1LEUCO', 'BV_HB']]
X_test = X_test_all[['weight', 'sex', 'height', 'BMI', 'age', 'HB_pre',
'HCT_pre', 'HCT_diff', 'BBS1PLT', 'BBS1LEUCO', 'BV_HB']]
X_all = X[['weight', 'sex', 'height', 'BMI', 'age', 'HB_pre', 'HCT_pre'
, 'HCT_diff', 'BBS1PLT', 'BBS1LEUCO', 'BV_HB']]
X_med = pd.DataFrame(X['BV_HB'])

# standard scaling
scaler = StandardScaler()
X_train[['weight', 'height', 'BMI', 'age', 'HB_pre', 'HCT_diff', 'BBS1P
LT', 'BBS1LEUCO', 'BV_HB']] = scaler.fit_transform(X_train[['weight', '
height', 'BMI', 'age', 'HB_pre', 'HCT_diff', 'BBS1PLT', 'BBS1LEUCO', 'B
V_HB']])
X_test[['weight', 'height', 'BMI', 'age', 'HB_pre', 'HCT_diff', 'BBS1PL
T', 'BBS1LEUCO', 'BV_HB']] = scaler.transform(X_test[['weight', 'height
', 'BMI', 'age', 'HB_pre', 'HCT_diff', 'BBS1PLT', 'BBS1LEUCO', 'BV_HB'
]])
```

## Medical Model

```
In [60]: from sklearn.linear_model import LinearRegression

reg = LinearRegression().fit(X_train_med, y_train)
y_pred = reg.predict(X_test_med)
```

```

MSE_reg = mean_squared_error(y_test, y_pred)
EV_reg = explained_variance_score(y_test, y_pred)

print('Medical Model: MSE: {}, EV: {}'.format(MSE_reg, EV_reg))
print('R^2 value:{}'.format(reg.score(X_train_med, y_train)))

```

```

Medical Model: MSE: 696.0207038872849, EV: 0.5419639699004295
R^2 value:0.455254022565739

```

```

In [30]: import statsmodels.api as sm
         from scipy import stats

```

```

X_med2 = sm.add_constant(X_med)
est = sm.OLS(y, X_med2).fit()
print(est.summary())

```

#### OLS Regression Results

```

=====
=====
Dep. Variable:          loss_g      R-squared:          0
.476
Model:                OLS      Adj. R-squared:      0
.474
Method:              Least Squares      F-statistic:        3
60.3
Date:                Tue, 29 Sep 2020      Prob (F-statistic): 1.2
2e-57
Time:                11:13:00      Log-Likelihood:     -18
77.3
No. Observations:    399      AIC:                3
759.
Df Residuals:        397      BIC:                37
67.
Df Model:            1

Covariance Type:      nonrobust

=====
=====
              coef      std err          t      P>|t|      [0.025      0.
975]
-----
const          46.0209      3.808      12.087      0.000      38.536      53
.506
BV_HB           0.5167      0.027      18.982      0.000      0.463      0
.570
=====
=====
Omnibus:            2.558      Durbin-Watson:      1
.058
Prob(Omnibus):      0.278      Jarque-Bera (JB):   2
.625
Skew:               0.055      Prob(JB):           0.
269
Kurtosis:           3.382      Cond. No.
397.
=====
=====

```

Warnings:

[1] Standard Errors assume that the covariance matrix of the errors is correctly specified.

## Linear Regression

```
In [33]: # hyperparameter tuning
X_train_lin = X_train[['sex', 'BV_HB']]
X_test_lin = X_test[['sex', 'BV_HB']]
```

```
In [34]: reg2 = LinearRegression().fit(X_train_lin, y_train)
y_pred = reg2.predict(X_test_lin)

MSE_reg2 = mean_squared_error(y_test, y_pred)
EV_reg2 = explained_variance_score(y_test, y_pred)

print('Linear Regression: MSE: {}, EV: {}'.format(MSE_reg2, EV_reg2))
```

Linear Regression: MSE: 614.2440384546053, EV: 0.601400547271544

```
In [35]: X_all
```

```
Out[35]:
```

|     | weight   | sex | height | BMI      | age      | HB_pre | HCT_pre   | HCT_diff  | BBS1PLT | BBS |
|-----|----------|-----|--------|----------|----------|--------|-----------|-----------|---------|-----|
| 0   | 4.962845 | 1   | 184    | 3.743313 | 3.401197 | 16.8   | -0.632753 | 0.232056  | 199     |     |
| 1   | 4.477337 | 1   | 185    | 3.246966 | 3.637586 | 14.5   | -0.353659 | 0.139721  | 257     |     |
| 2   | 4.317488 | 0   | 175    | 3.198257 | 3.688879 | 14.4   | -0.149129 | -0.111847 | 276     |     |
| 3   | 4.653960 | 1   | 186    | 3.412807 | 3.784190 | 16.0   | -0.111498 | 0.070035  | 243     |     |
| 4   | 4.477337 | 0   | 178    | 3.324110 | 3.496508 | 12.8   | -0.047387 | -0.096864 | 214     |     |
| ... | ...      | ... | ...    | ...      | ...      | ...    | ...       | ...       | ...     | ... |
| 394 | 4.454347 | 1   | 190    | 3.170640 | 3.688879 | 14.0   | 1.191638  | -0.414634 | 293     |     |
| 395 | 4.532599 | 1   | 180    | 3.357026 | 4.025352 | 15.6   | -0.303833 | 0.150523  | 231     |     |
| 396 | 4.624973 | 1   | 181    | 3.438319 | 3.178054 | 16.2   | -0.032753 | -0.063066 | 271     |     |
| 397 | 4.465908 | 1   | 189    | 3.192754 | 3.178054 | 15.0   | -0.505226 | 0.102091  | 286     |     |
| 398 | 4.553877 | 1   | 180    | 3.378304 | 3.218876 | 14.8   | -0.374913 | 0.104530  | 231     |     |

399 rows x 11 columns

```
In [39]: import statsmodels.api as sm
from scipy import stats

X_all2 = X_all[['sex', 'BV_HB']]
#X_all2['sex_BV_HB'] = X_all2['sex'] * X_all2['BV_HB']
X_all2 = sm.add_constant(X_all2)
est = sm.OLS(y, X_all2).fit()
print(est.summary())
```

OLS Regression Results

=====

```

=====
Dep. Variable:          loss_g    R-squared:          0
.532
Model:                  OLS      Adj. R-squared:     0
.529
Method:                 Least Squares    F-statistic:        2
24.8
Date:                   Tue, 29 Sep 2020    Prob (F-statistic): 5.8
1e-66
Time:                   11:14:44    Log-Likelihood:     -18
54.8
No. Observations:      399    AIC:                3
716.
Df Residuals:          396    BIC:                37
28.
Df Model:               2

```

```
Covariance Type:      nonrobust
```

```

=====
=====
coef      std err      t      P>|t|      [0.025      0.
975]
-----
-----
const      42.5130      3.639      11.682      0.000      35.358      49
.668
sex         19.5454      2.842      6.877      0.000      13.957      25
.133
BV_HB       0.4477      0.028      16.194      0.000      0.393      0
.502
=====
=====
Omnibus:          13.772    Durbin-Watson:      0
.979
Prob(Omnibus):   0.001    Jarque-Bera (JB):   17
.980
Skew:            -0.313    Prob(JB):           0.00
0125
Kurtosis:        3.830    Cond. No.
407.
=====
=====

```

Warnings:

```
[1] Standard Errors assume that the covariance matrix of the errors is c
orrectly specified.
```

## Ridge Regression

```
In [40]: # cross-validated grid search
parameters = {'alpha': np.arange(1,20)}
reg3_base = Ridge(random_state=0)
reg3 = GridSearchCV(reg3_base, parameters, scoring='neg_mean_squared_err
or', cv=5).fit(X_train, y_train)
```

```
In [41]: reg3.best_params_
```

```
Out[41]: {'alpha': 5}
```

```
In [42]: y_pred = reg3.predict(X_test)

MSE_reg3 = mean_squared_error(y_test, y_pred)
EV_reg3 = explained_variance_score(y_test, y_pred)

print('Ridge Regression: MSE: {}, EV: {}'.format(MSE_reg3, EV_reg3))

Ridge Regression: MSE: 612.7910376259383, EV: 0.5954568274744507
```

## AdaBoost

```
In [43]: # grid search with GINI
parameters = {'n_estimators': [50, 75, 100, 125, 150]}
ada_base = AdaBoostRegressor(base_estimator=DecisionTreeRegressor(criterion='mse', max_depth=5, ccp_alpha=0.1), random_state=0)
ada = GridSearchCV(ada_base, parameters, scoring='neg_mean_squared_error', cv=5).fit(X_train, y_train)
```

```
In [44]: ada.best_params_
```

```
Out[44]: {'n_estimators': 100}
```

```
In [45]: y_pred = ada.predict(X_test)

MSE_ada = mean_squared_error(y_test, y_pred)
EV_ada = explained_variance_score(y_test, y_pred)

print('AdaBoostRegressor: MSE: {}, EV: {}'.format(MSE_ada, EV_ada))

AdaBoostRegressor: MSE: 807.575036440719, EV: 0.4655880194014991
```

## Random Forest

```
In [46]: parameters = {'n_estimators': [30, 40, 50, 60], 'max_depth': [4, 5, 6, 7]}
rf_base = RandomForestRegressor(random_state=0)
rf = GridSearchCV(rf_base, parameters, scoring='neg_mean_squared_error', cv=5).fit(X_train, y_train)
```

```
In [47]: rf.best_params_
```

```
Out[47]: {'max_depth': 4, 'n_estimators': 40}
```

```
In [48]: y_pred = rf.predict(X_test)

MSE_rf = mean_squared_error(y_test, y_pred)
EV_rf = explained_variance_score(y_test, y_pred)

print('RandomForestRegressor: MSE: {}, EV: {}'.format(MSE_rf, EV_rf))

RandomForestRegressor: MSE: 726.3067320732474, EV: 0.5122053865071159
```

## Support Vector Regression

```
In [49]: parameters = {'C': np.arange(5,10), 'epsilon': np.arange(0,10)/10}
svr_base = SVR()
svr = GridSearchCV(svr_base, parameters, scoring='neg_mean_squared_error', cv=5).fit(X_train, y_train)
```

```
In [50]: svr.best_params_
```

```
Out[50]: {'C': 9, 'epsilon': 0.9}
```

```
In [51]: y_pred = svr.predict(X_test)

MSE_svr = mean_squared_error(y_test, y_pred)
EV_svr = explained_variance_score(y_test, y_pred)

print('Support Vector Regression: MSE: {}, EV: {}'.format(MSE_svr, EV_svr))
```

```
Support Vector Regression: MSE: 656.8565142629554, EV: 0.5484925490757212
```

## kNN

```
In [52]: # grid search
parameters = {'n_neighbors': [5,10,20,50, 100]}
knn_base = KNeighborsRegressor()
knn = GridSearchCV(knn_base, parameters, scoring='neg_mean_squared_error', cv=5, n_jobs=-1).fit(X_train, y_train)
```

```
In [53]: knn.best_params_
```

```
Out[53]: {'n_neighbors': 20}
```

```
In [54]: y_pred = knn.predict(X_test)

MSE_knn = mean_squared_error(y_test, y_pred)
EV_knn = explained_variance_score(y_test, y_pred)

print('kNN regression: MSE: {}, EV: {}'.format(MSE_knn, EV_knn))
```

```
kNN regression: MSE: 682.5534900346695, EV: 0.5365725451450432
```

## Neural Network

```
In [61]: from keras.models import Sequential
from keras.layers.core import Dense, Activation, Flatten, Dropout

# Building the model
model = Sequential()
model.add(Dense(16, input_dim=11, kernel_initializer='normal', activation='relu'))
model.add(Dropout(.2))
model.add(Dense(16, activation='relu'))
model.add(Dropout(.2))
model.add(Dense(16, activation='relu'))
model.add(Dropout(.2))
model.add(Dense(1, activation='relu'))
```

```

model.compile(loss='mse', optimizer='adam', metrics=['mse'])

history = model.fit(X_train, y_train, epochs=500, batch_size=25, verbose=1, validation_split=0.2)

y_pred = model.predict(X_test)
MSE_nn = mean_squared_error(y_test, y_pred)
EV_nn = explained_variance_score(y_test, y_pred)

print('Neural Network: MSE: {}, EV: {}'.format(MSE_nn, EV_nn))

```

```

Epoch 1/500
10/10 [=====] - 0s 20ms/step - loss: 14113.8584
- mse: 14113.8584 - val_loss: 13519.8418 - val_mse: 13519.8418
Epoch 2/500
10/10 [=====] - 0s 4ms/step - loss: 14094.5752
- mse: 14094.5752 - val_loss: 13496.9121 - val_mse: 13496.9121
Epoch 3/500
10/10 [=====] - 0s 6ms/step - loss: 14065.7109
- mse: 14065.7109 - val_loss: 13464.9834 - val_mse: 13464.9834
Epoch 4/500
10/10 [=====] - 0s 4ms/step - loss: 14028.1494
- mse: 14028.1494 - val_loss: 13418.9648 - val_mse: 13418.9639
Epoch 5/500
10/10 [=====] - 0s 4ms/step - loss: 13970.8936
- mse: 13970.8936 - val_loss: 13353.3662 - val_mse: 13353.3662
Epoch 6/500
10/10 [=====] - 0s 5ms/step - loss: 13888.2070
- mse: 13888.2070 - val_loss: 13260.9336 - val_mse: 13260.9336
Epoch 7/500
10/10 [=====] - 0s 5ms/step - loss: 13769.4150
- mse: 13769.4150 - val_loss: 13132.3691 - val_mse: 13132.3691
Epoch 8/500
10/10 [=====] - 0s 4ms/step - loss: 13604.6953
- mse: 13604.6953 - val_loss: 12953.0615 - val_mse: 12953.0615
Epoch 9/500
10/10 [=====] - 0s 3ms/step - loss: 13384.6025
- mse: 13384.6025 - val_loss: 12707.0312 - val_mse: 12707.0312
Epoch 10/500
10/10 [=====] - 0s 4ms/step - loss: 13062.5703
- mse: 13062.5703 - val_loss: 12368.8467 - val_mse: 12368.8467
Epoch 11/500
10/10 [=====] - 0s 4ms/step - loss: 12627.6797
- mse: 12627.6797 - val_loss: 11922.8184 - val_mse: 11922.8184
Epoch 12/500
10/10 [=====] - 0s 4ms/step - loss: 12021.8486
- mse: 12021.8486 - val_loss: 11340.2500 - val_mse: 11340.2500
Epoch 13/500
10/10 [=====] - 0s 3ms/step - loss: 11456.2930
- mse: 11456.2930 - val_loss: 10609.7002 - val_mse: 10609.7012
Epoch 14/500
10/10 [=====] - 0s 4ms/step - loss: 10672.5527
- mse: 10672.5508 - val_loss: 9720.7500 - val_mse: 9720.7500
Epoch 15/500
10/10 [=====] - 0s 3ms/step - loss: 9573.9375 -
mse: 9573.9375 - val_loss: 8672.5986 - val_mse: 8672.5986
Epoch 16/500
10/10 [=====] - 0s 3ms/step - loss: 8268.2861 -
mse: 8268.2861 - val_loss: 7496.7144 - val_mse: 7496.7144
Epoch 17/500

```



```
10/10 [=====] - 0s 4ms/step - loss: 7063.7998 -  
mse: 7063.7998 - val_loss: 6216.3047 - val_mse: 6216.3047  
Epoch 18/500  
10/10 [=====] - 0s 3ms/step - loss: 5792.0874 -  
mse: 5792.0874 - val_loss: 4962.8462 - val_mse: 4962.8462  
Epoch 19/500  
10/10 [=====] - 0s 4ms/step - loss: 4484.7363 -  
mse: 4484.7363 - val_loss: 3889.9915 - val_mse: 3889.9915  
Epoch 20/500  
10/10 [=====] - 0s 3ms/step - loss: 3625.5305 -  
mse: 3625.5305 - val_loss: 3069.6897 - val_mse: 3069.6897  
Epoch 21/500  
10/10 [=====] - 0s 3ms/step - loss: 2779.8733 -  
mse: 2779.8733 - val_loss: 2502.9844 - val_mse: 2502.9844  
Epoch 22/500  
10/10 [=====] - 0s 4ms/step - loss: 2298.4397 -  
mse: 2298.4397 - val_loss: 2191.9172 - val_mse: 2191.9172  
Epoch 23/500  
10/10 [=====] - 0s 4ms/step - loss: 2386.1108 -  
mse: 2386.1108 - val_loss: 2025.3575 - val_mse: 2025.3575  
Epoch 24/500  
10/10 [=====] - 0s 4ms/step - loss: 2389.8752 -  
mse: 2389.8752 - val_loss: 1951.8323 - val_mse: 1951.8323  
Epoch 25/500  
10/10 [=====] - 0s 3ms/step - loss: 2292.4839 -  
mse: 2292.4839 - val_loss: 1903.5187 - val_mse: 1903.5187  
Epoch 26/500  
10/10 [=====] - 0s 4ms/step - loss: 2070.6101 -  
mse: 2070.6101 - val_loss: 1854.6979 - val_mse: 1854.6979  
Epoch 27/500  
10/10 [=====] - 0s 4ms/step - loss: 2080.5908 -  
mse: 2080.5908 - val_loss: 1823.5801 - val_mse: 1823.5801  
Epoch 28/500  
10/10 [=====] - 0s 4ms/step - loss: 2144.8110 -  
mse: 2144.8110 - val_loss: 1783.2067 - val_mse: 1783.2067  
Epoch 29/500  
10/10 [=====] - 0s 4ms/step - loss: 2347.6414 -  
mse: 2347.6414 - val_loss: 1762.4703 - val_mse: 1762.4703  
Epoch 30/500  
10/10 [=====] - 0s 4ms/step - loss: 1933.8788 -  
mse: 1933.8788 - val_loss: 1732.2152 - val_mse: 1732.2152  
Epoch 31/500  
10/10 [=====] - 0s 3ms/step - loss: 2120.7637 -  
mse: 2120.7637 - val_loss: 1701.5151 - val_mse: 1701.5151  
Epoch 32/500  
10/10 [=====] - 0s 4ms/step - loss: 2061.1006 -  
mse: 2061.1006 - val_loss: 1666.3718 - val_mse: 1666.3718  
Epoch 33/500  
10/10 [=====] - 0s 3ms/step - loss: 2004.1423 -  
mse: 2004.1422 - val_loss: 1610.8424 - val_mse: 1610.8424  
Epoch 34/500  
10/10 [=====] - 0s 4ms/step - loss: 2029.0154 -  
mse: 2029.0154 - val_loss: 1566.4816 - val_mse: 1566.4816  
Epoch 35/500  
10/10 [=====] - 0s 4ms/step - loss: 1673.5566 -  
mse: 1673.5566 - val_loss: 1524.0061 - val_mse: 1524.0061  
Epoch 36/500  
10/10 [=====] - 0s 4ms/step - loss: 1795.5920 -  
mse: 1795.5920 - val_loss: 1496.8381 - val_mse: 1496.8381  
Epoch 37/500  
10/10 [=====] - 0s 4ms/step - loss: 1723.1383 -
```

```
mse: 1723.1383 - val_loss: 1467.2522 - val_mse: 1467.2522
Epoch 38/500
10/10 [=====] - 0s 4ms/step - loss: 1689.2614 -
mse: 1689.2614 - val_loss: 1436.6813 - val_mse: 1436.6813
Epoch 39/500
10/10 [=====] - 0s 4ms/step - loss: 1865.7874 -
mse: 1865.7874 - val_loss: 1407.7626 - val_mse: 1407.7626
Epoch 40/500
10/10 [=====] - 0s 4ms/step - loss: 2048.2585 -
mse: 2048.2585 - val_loss: 1390.5431 - val_mse: 1390.5431
Epoch 41/500
10/10 [=====] - 0s 4ms/step - loss: 1706.8531 -
mse: 1706.8531 - val_loss: 1365.1997 - val_mse: 1365.1998
Epoch 42/500
10/10 [=====] - 0s 3ms/step - loss: 1937.6060 -
mse: 1937.6060 - val_loss: 1335.3107 - val_mse: 1335.3107
Epoch 43/500
10/10 [=====] - 0s 4ms/step - loss: 1601.1340 -
mse: 1601.1340 - val_loss: 1310.9661 - val_mse: 1310.9661
Epoch 44/500
10/10 [=====] - 0s 4ms/step - loss: 1537.4478 -
mse: 1537.4478 - val_loss: 1285.3125 - val_mse: 1285.3125
Epoch 45/500
10/10 [=====] - 0s 4ms/step - loss: 1827.6326 -
mse: 1827.6326 - val_loss: 1270.3694 - val_mse: 1270.3694
Epoch 46/500
10/10 [=====] - 0s 5ms/step - loss: 1588.1027 -
mse: 1588.1025 - val_loss: 1273.9954 - val_mse: 1273.9954
Epoch 47/500
10/10 [=====] - 0s 5ms/step - loss: 1682.6407 -
mse: 1682.6407 - val_loss: 1256.1118 - val_mse: 1256.1118
Epoch 48/500
10/10 [=====] - 0s 4ms/step - loss: 1922.7532 -
mse: 1922.7532 - val_loss: 1245.0521 - val_mse: 1245.0522
Epoch 49/500
10/10 [=====] - 0s 4ms/step - loss: 1584.2712 -
mse: 1584.2710 - val_loss: 1233.5823 - val_mse: 1233.5823
Epoch 50/500
10/10 [=====] - 0s 3ms/step - loss: 1513.9280 -
mse: 1513.9280 - val_loss: 1210.9475 - val_mse: 1210.9475
Epoch 51/500
10/10 [=====] - 0s 4ms/step - loss: 1816.0553 -
mse: 1816.0553 - val_loss: 1201.8634 - val_mse: 1201.8635
Epoch 52/500
10/10 [=====] - 0s 4ms/step - loss: 1655.7990 -
mse: 1655.7990 - val_loss: 1178.0294 - val_mse: 1178.0294
Epoch 53/500
10/10 [=====] - 0s 4ms/step - loss: 1641.3564 -
mse: 1641.3564 - val_loss: 1170.9902 - val_mse: 1170.9902
Epoch 54/500
10/10 [=====] - 0s 4ms/step - loss: 1523.4384 -
mse: 1523.4384 - val_loss: 1164.1022 - val_mse: 1164.1022
Epoch 55/500
10/10 [=====] - 0s 3ms/step - loss: 1480.5582 -
mse: 1480.5582 - val_loss: 1150.2328 - val_mse: 1150.2328
Epoch 56/500
10/10 [=====] - 0s 4ms/step - loss: 1542.3590 -
mse: 1542.3590 - val_loss: 1133.5095 - val_mse: 1133.5095
Epoch 57/500
10/10 [=====] - 0s 4ms/step - loss: 1388.3911 -
mse: 1388.3912 - val_loss: 1132.3831 - val_mse: 1132.3831
```

Epoch 58/500  
10/10 [=====] - 0s 4ms/step - loss: 1704.9537 -  
mse: 1704.9537 - val\_loss: 1126.0933 - val\_mse: 1126.0933  
Epoch 59/500  
10/10 [=====] - 0s 4ms/step - loss: 1501.8459 -  
mse: 1501.8459 - val\_loss: 1118.7814 - val\_mse: 1118.7814  
Epoch 60/500  
10/10 [=====] - 0s 4ms/step - loss: 1488.4066 -  
mse: 1488.4066 - val\_loss: 1116.7825 - val\_mse: 1116.7825  
Epoch 61/500  
10/10 [=====] - 0s 3ms/step - loss: 1612.2938 -  
mse: 1612.2938 - val\_loss: 1115.7092 - val\_mse: 1115.7092  
Epoch 62/500  
10/10 [=====] - 0s 4ms/step - loss: 1400.9644 -  
mse: 1400.9644 - val\_loss: 1113.2502 - val\_mse: 1113.2502  
Epoch 63/500  
10/10 [=====] - 0s 3ms/step - loss: 1481.7429 -  
mse: 1481.7429 - val\_loss: 1106.7555 - val\_mse: 1106.7555  
Epoch 64/500  
10/10 [=====] - 0s 4ms/step - loss: 1828.8519 -  
mse: 1828.8519 - val\_loss: 1107.2480 - val\_mse: 1107.2480  
Epoch 65/500  
10/10 [=====] - 0s 3ms/step - loss: 1409.8960 -  
mse: 1409.8960 - val\_loss: 1100.1747 - val\_mse: 1100.1747  
Epoch 66/500  
10/10 [=====] - 0s 3ms/step - loss: 1283.8092 -  
mse: 1283.8093 - val\_loss: 1101.1429 - val\_mse: 1101.1429  
Epoch 67/500  
10/10 [=====] - 0s 3ms/step - loss: 1605.5055 -  
mse: 1605.5055 - val\_loss: 1104.2782 - val\_mse: 1104.2782  
Epoch 68/500  
10/10 [=====] - 0s 4ms/step - loss: 1632.5492 -  
mse: 1632.5492 - val\_loss: 1111.7773 - val\_mse: 1111.7773  
Epoch 69/500  
10/10 [=====] - 0s 3ms/step - loss: 1674.4296 -  
mse: 1674.4296 - val\_loss: 1139.0167 - val\_mse: 1139.0167  
Epoch 70/500  
10/10 [=====] - 0s 3ms/step - loss: 1525.4738 -  
mse: 1525.4738 - val\_loss: 1109.5133 - val\_mse: 1109.5133  
Epoch 71/500  
10/10 [=====] - 0s 3ms/step - loss: 1716.6189 -  
mse: 1716.6189 - val\_loss: 1072.7677 - val\_mse: 1072.7677  
Epoch 72/500  
10/10 [=====] - 0s 3ms/step - loss: 1461.0848 -  
mse: 1461.0848 - val\_loss: 1064.0365 - val\_mse: 1064.0365  
Epoch 73/500  
10/10 [=====] - 0s 3ms/step - loss: 1624.7115 -  
mse: 1624.7115 - val\_loss: 1064.6389 - val\_mse: 1064.6389  
Epoch 74/500  
10/10 [=====] - 0s 3ms/step - loss: 1545.7759 -  
mse: 1545.7759 - val\_loss: 1064.7792 - val\_mse: 1064.7792  
Epoch 75/500  
10/10 [=====] - 0s 3ms/step - loss: 1617.8677 -  
mse: 1617.8677 - val\_loss: 1046.3124 - val\_mse: 1046.3123  
Epoch 76/500  
10/10 [=====] - 0s 4ms/step - loss: 1507.6062 -  
mse: 1507.6062 - val\_loss: 1057.3970 - val\_mse: 1057.3970  
Epoch 77/500  
10/10 [=====] - 0s 3ms/step - loss: 1636.3237 -  
mse: 1636.3237 - val\_loss: 1052.0903 - val\_mse: 1052.0903  
Epoch 78/500

10/10 [=====] - 0s 3ms/step - loss: 1466.4041 -  
mse: 1466.4041 - val\_loss: 1042.3163 - val\_mse: 1042.3163  
Epoch 79/500  
10/10 [=====] - 0s 3ms/step - loss: 1599.5238 -  
mse: 1599.5238 - val\_loss: 1013.6000 - val\_mse: 1013.6000  
Epoch 80/500  
10/10 [=====] - 0s 3ms/step - loss: 1637.8413 -  
mse: 1637.8413 - val\_loss: 1021.3125 - val\_mse: 1021.3125  
Epoch 81/500  
10/10 [=====] - 0s 5ms/step - loss: 1325.9983 -  
mse: 1325.9983 - val\_loss: 1013.3209 - val\_mse: 1013.3209  
Epoch 82/500  
10/10 [=====] - 0s 5ms/step - loss: 1567.1573 -  
mse: 1567.1573 - val\_loss: 1008.1964 - val\_mse: 1008.1964  
Epoch 83/500  
10/10 [=====] - 0s 3ms/step - loss: 1443.4208 -  
mse: 1443.4208 - val\_loss: 1004.2158 - val\_mse: 1004.2158  
Epoch 84/500  
10/10 [=====] - 0s 3ms/step - loss: 1621.9407 -  
mse: 1621.9407 - val\_loss: 1013.2300 - val\_mse: 1013.2300  
Epoch 85/500  
10/10 [=====] - 0s 4ms/step - loss: 1332.0472 -  
mse: 1332.0472 - val\_loss: 1018.9466 - val\_mse: 1018.9466  
Epoch 86/500  
10/10 [=====] - 0s 3ms/step - loss: 1474.2871 -  
mse: 1474.2871 - val\_loss: 994.8481 - val\_mse: 994.8481  
Epoch 87/500  
10/10 [=====] - 0s 3ms/step - loss: 1393.5994 -  
mse: 1393.5994 - val\_loss: 984.1044 - val\_mse: 984.1044  
Epoch 88/500  
10/10 [=====] - 0s 4ms/step - loss: 1540.8494 -  
mse: 1540.8494 - val\_loss: 1000.8593 - val\_mse: 1000.8593  
Epoch 89/500  
10/10 [=====] - 0s 3ms/step - loss: 1397.4808 -  
mse: 1397.4808 - val\_loss: 996.7819 - val\_mse: 996.7819  
Epoch 90/500  
10/10 [=====] - 0s 4ms/step - loss: 1340.9755 -  
mse: 1340.9753 - val\_loss: 994.9642 - val\_mse: 994.9642  
Epoch 91/500  
10/10 [=====] - 0s 3ms/step - loss: 1388.3473 -  
mse: 1388.3473 - val\_loss: 1007.4903 - val\_mse: 1007.4903  
Epoch 92/500  
10/10 [=====] - 0s 4ms/step - loss: 1358.9313 -  
mse: 1358.9313 - val\_loss: 1000.5961 - val\_mse: 1000.5961  
Epoch 93/500  
10/10 [=====] - 0s 4ms/step - loss: 1337.6323 -  
mse: 1337.6323 - val\_loss: 983.3044 - val\_mse: 983.3044  
Epoch 94/500  
10/10 [=====] - 0s 3ms/step - loss: 1221.3855 -  
mse: 1221.3855 - val\_loss: 978.1163 - val\_mse: 978.1163  
Epoch 95/500  
10/10 [=====] - 0s 4ms/step - loss: 1660.2075 -  
mse: 1660.2076 - val\_loss: 977.7682 - val\_mse: 977.7682  
Epoch 96/500  
10/10 [=====] - 0s 3ms/step - loss: 1262.6306 -  
mse: 1262.6306 - val\_loss: 989.1768 - val\_mse: 989.1768  
Epoch 97/500  
10/10 [=====] - 0s 4ms/step - loss: 1441.6158 -  
mse: 1441.6158 - val\_loss: 989.9921 - val\_mse: 989.9921  
Epoch 98/500  
10/10 [=====] - 0s 3ms/step - loss: 1460.1200 -

mse: 1460.1200 - val\_loss: 991.1652 - val\_mse: 991.1652  
Epoch 99/500  
10/10 [=====] - 0s 3ms/step - loss: 1291.0208 -  
mse: 1291.0208 - val\_loss: 987.1071 - val\_mse: 987.1071  
Epoch 100/500  
10/10 [=====] - 0s 3ms/step - loss: 1391.8069 -  
mse: 1391.8069 - val\_loss: 982.2734 - val\_mse: 982.2734  
Epoch 101/500  
10/10 [=====] - 0s 3ms/step - loss: 1423.8914 -  
mse: 1423.8914 - val\_loss: 972.9385 - val\_mse: 972.9385  
Epoch 102/500  
10/10 [=====] - 0s 3ms/step - loss: 1407.4174 -  
mse: 1407.4174 - val\_loss: 970.5777 - val\_mse: 970.5777  
Epoch 103/500  
10/10 [=====] - 0s 3ms/step - loss: 1328.5078 -  
mse: 1328.5078 - val\_loss: 968.5988 - val\_mse: 968.5988  
Epoch 104/500  
10/10 [=====] - 0s 4ms/step - loss: 1546.8564 -  
mse: 1546.8564 - val\_loss: 962.0967 - val\_mse: 962.0967  
Epoch 105/500  
10/10 [=====] - 0s 3ms/step - loss: 1397.0552 -  
mse: 1397.0552 - val\_loss: 952.6219 - val\_mse: 952.6219  
Epoch 106/500  
10/10 [=====] - 0s 4ms/step - loss: 1528.3878 -  
mse: 1528.3878 - val\_loss: 978.2203 - val\_mse: 978.2203  
Epoch 107/500  
10/10 [=====] - 0s 3ms/step - loss: 1548.9918 -  
mse: 1548.9918 - val\_loss: 971.5810 - val\_mse: 971.5810  
Epoch 108/500  
10/10 [=====] - 0s 3ms/step - loss: 1286.6968 -  
mse: 1286.6968 - val\_loss: 953.4104 - val\_mse: 953.4104  
Epoch 109/500  
10/10 [=====] - 0s 3ms/step - loss: 1370.1697 -  
mse: 1370.1698 - val\_loss: 946.2525 - val\_mse: 946.2525  
Epoch 110/500  
10/10 [=====] - 0s 4ms/step - loss: 1657.2716 -  
mse: 1657.2716 - val\_loss: 967.9604 - val\_mse: 967.9604  
Epoch 111/500  
10/10 [=====] - 0s 3ms/step - loss: 1484.2999 -  
mse: 1484.2999 - val\_loss: 963.3969 - val\_mse: 963.3969  
Epoch 112/500  
10/10 [=====] - 0s 3ms/step - loss: 1420.0858 -  
mse: 1420.0858 - val\_loss: 963.3353 - val\_mse: 963.3353  
Epoch 113/500  
10/10 [=====] - 0s 4ms/step - loss: 1653.5613 -  
mse: 1653.5613 - val\_loss: 957.5650 - val\_mse: 957.5650  
Epoch 114/500  
10/10 [=====] - 0s 4ms/step - loss: 1575.9922 -  
mse: 1575.9922 - val\_loss: 937.5743 - val\_mse: 937.5743  
Epoch 115/500  
10/10 [=====] - 0s 3ms/step - loss: 1383.3174 -  
mse: 1383.3174 - val\_loss: 923.6319 - val\_mse: 923.6319  
Epoch 116/500  
10/10 [=====] - 0s 3ms/step - loss: 1354.1208 -  
mse: 1354.1208 - val\_loss: 922.7648 - val\_mse: 922.7648  
Epoch 117/500  
10/10 [=====] - 0s 4ms/step - loss: 1392.3209 -  
mse: 1392.3209 - val\_loss: 929.3973 - val\_mse: 929.3973  
Epoch 118/500  
10/10 [=====] - 0s 4ms/step - loss: 1712.8008 -  
mse: 1712.8008 - val\_loss: 921.2775 - val\_mse: 921.2774

```
Epoch 119/500
10/10 [=====] - 0s 4ms/step - loss: 1504.9375 -
mse: 1504.9375 - val_loss: 917.9805 - val_mse: 917.9805
Epoch 120/500
10/10 [=====] - 0s 4ms/step - loss: 1209.1926 -
mse: 1209.1926 - val_loss: 917.1066 - val_mse: 917.1066
Epoch 121/500
10/10 [=====] - 0s 3ms/step - loss: 1532.2646 -
mse: 1532.2645 - val_loss: 913.7321 - val_mse: 913.7321
Epoch 122/500
10/10 [=====] - 0s 3ms/step - loss: 1374.5208 -
mse: 1374.5208 - val_loss: 901.1774 - val_mse: 901.1773
Epoch 123/500
10/10 [=====] - 0s 4ms/step - loss: 1402.3363 -
mse: 1402.3363 - val_loss: 893.7114 - val_mse: 893.7114
Epoch 124/500
10/10 [=====] - 0s 4ms/step - loss: 1449.3889 -
mse: 1449.3889 - val_loss: 907.0013 - val_mse: 907.0013
Epoch 125/500
10/10 [=====] - 0s 3ms/step - loss: 1443.4170 -
mse: 1443.4170 - val_loss: 918.4592 - val_mse: 918.4592
Epoch 126/500
10/10 [=====] - 0s 3ms/step - loss: 1502.7280 -
mse: 1502.7279 - val_loss: 927.5403 - val_mse: 927.5403
Epoch 127/500
10/10 [=====] - 0s 4ms/step - loss: 1225.1086 -
mse: 1225.1086 - val_loss: 913.9559 - val_mse: 913.9559
Epoch 128/500
10/10 [=====] - 0s 4ms/step - loss: 1066.6537 -
mse: 1066.6537 - val_loss: 908.6097 - val_mse: 908.6097
Epoch 129/500
10/10 [=====] - 0s 4ms/step - loss: 1431.9304 -
mse: 1431.9304 - val_loss: 906.5583 - val_mse: 906.5583
Epoch 130/500
10/10 [=====] - 0s 3ms/step - loss: 1373.9139 -
mse: 1373.9139 - val_loss: 915.6204 - val_mse: 915.6204
Epoch 131/500
10/10 [=====] - 0s 4ms/step - loss: 1414.6234 -
mse: 1414.6234 - val_loss: 934.0437 - val_mse: 934.0437
Epoch 132/500
10/10 [=====] - 0s 3ms/step - loss: 1304.5679 -
mse: 1304.5679 - val_loss: 910.3835 - val_mse: 910.3835
Epoch 133/500
10/10 [=====] - 0s 3ms/step - loss: 1398.8020 -
mse: 1398.8020 - val_loss: 891.3629 - val_mse: 891.3629
Epoch 134/500
10/10 [=====] - 0s 4ms/step - loss: 1283.0360 -
mse: 1283.0360 - val_loss: 879.9183 - val_mse: 879.9183
Epoch 135/500
10/10 [=====] - 0s 3ms/step - loss: 1419.1575 -
mse: 1419.1575 - val_loss: 879.2272 - val_mse: 879.2272
Epoch 136/500
10/10 [=====] - 0s 3ms/step - loss: 1449.8429 -
mse: 1449.8429 - val_loss: 881.5363 - val_mse: 881.5363
Epoch 137/500
10/10 [=====] - 0s 4ms/step - loss: 1299.3246 -
mse: 1299.3246 - val_loss: 913.9308 - val_mse: 913.9308
Epoch 138/500
10/10 [=====] - 0s 4ms/step - loss: 1421.0500 -
mse: 1421.0500 - val_loss: 926.0457 - val_mse: 926.0457
Epoch 139/500
```

10/10 [=====] - 0s 3ms/step - loss: 1459.9695 -  
mse: 1459.9695 - val\_loss: 924.1078 - val\_mse: 924.1080  
Epoch 140/500  
10/10 [=====] - 0s 4ms/step - loss: 1556.2072 -  
mse: 1556.2072 - val\_loss: 906.1376 - val\_mse: 906.1376  
Epoch 141/500  
10/10 [=====] - 0s 3ms/step - loss: 1340.1305 -  
mse: 1340.1305 - val\_loss: 887.2172 - val\_mse: 887.2172  
Epoch 142/500  
10/10 [=====] - 0s 3ms/step - loss: 1577.2697 -  
mse: 1577.2697 - val\_loss: 901.0797 - val\_mse: 901.0795  
Epoch 143/500  
10/10 [=====] - 0s 3ms/step - loss: 1308.5398 -  
mse: 1308.5398 - val\_loss: 884.1826 - val\_mse: 884.1826  
Epoch 144/500  
10/10 [=====] - 0s 3ms/step - loss: 1489.9871 -  
mse: 1489.9871 - val\_loss: 865.4738 - val\_mse: 865.4738  
Epoch 145/500  
10/10 [=====] - 0s 3ms/step - loss: 1452.3877 -  
mse: 1452.3877 - val\_loss: 862.9601 - val\_mse: 862.9601  
Epoch 146/500  
10/10 [=====] - 0s 4ms/step - loss: 1421.4149 -  
mse: 1421.4149 - val\_loss: 878.8065 - val\_mse: 878.8065  
Epoch 147/500  
10/10 [=====] - 0s 3ms/step - loss: 1489.0149 -  
mse: 1489.0149 - val\_loss: 865.7858 - val\_mse: 865.7858  
Epoch 148/500  
10/10 [=====] - 0s 3ms/step - loss: 1391.5923 -  
mse: 1391.5923 - val\_loss: 854.5676 - val\_mse: 854.5676  
Epoch 149/500  
10/10 [=====] - 0s 3ms/step - loss: 1227.0861 -  
mse: 1227.0861 - val\_loss: 855.2108 - val\_mse: 855.2108  
Epoch 150/500  
10/10 [=====] - 0s 4ms/step - loss: 1354.7725 -  
mse: 1354.7725 - val\_loss: 859.3278 - val\_mse: 859.3278  
Epoch 151/500  
10/10 [=====] - 0s 3ms/step - loss: 1268.0596 -  
mse: 1268.0596 - val\_loss: 856.2560 - val\_mse: 856.2560  
Epoch 152/500  
10/10 [=====] - 0s 4ms/step - loss: 1484.6818 -  
mse: 1484.6818 - val\_loss: 860.2535 - val\_mse: 860.2535  
Epoch 153/500  
10/10 [=====] - 0s 3ms/step - loss: 1288.9027 -  
mse: 1288.9027 - val\_loss: 858.0693 - val\_mse: 858.0693  
Epoch 154/500  
10/10 [=====] - 0s 3ms/step - loss: 1244.9432 -  
mse: 1244.9432 - val\_loss: 860.1612 - val\_mse: 860.1612  
Epoch 155/500  
10/10 [=====] - 0s 3ms/step - loss: 1387.1777 -  
mse: 1387.1777 - val\_loss: 858.9459 - val\_mse: 858.9459  
Epoch 156/500  
10/10 [=====] - 0s 3ms/step - loss: 1376.3082 -  
mse: 1376.3082 - val\_loss: 864.5803 - val\_mse: 864.5804  
Epoch 157/500  
10/10 [=====] - 0s 3ms/step - loss: 1428.9827 -  
mse: 1428.9827 - val\_loss: 881.0049 - val\_mse: 881.0049  
Epoch 158/500  
10/10 [=====] - 0s 3ms/step - loss: 1233.8821 -  
mse: 1233.8821 - val\_loss: 887.1057 - val\_mse: 887.1057  
Epoch 159/500  
10/10 [=====] - 0s 3ms/step - loss: 1198.9510 -

```
mse: 1198.9510 - val_loss: 885.4933 - val_mse: 885.4933
Epoch 160/500
10/10 [=====] - 0s 4ms/step - loss: 1265.2518 -
mse: 1265.2517 - val_loss: 886.6837 - val_mse: 886.6837
Epoch 161/500
10/10 [=====] - 0s 3ms/step - loss: 1329.1714 -
mse: 1329.1714 - val_loss: 885.4796 - val_mse: 885.4796
Epoch 162/500
10/10 [=====] - 0s 3ms/step - loss: 1134.1901 -
mse: 1134.1901 - val_loss: 884.0490 - val_mse: 884.0489
Epoch 163/500
10/10 [=====] - 0s 4ms/step - loss: 1441.9873 -
mse: 1441.9873 - val_loss: 879.8815 - val_mse: 879.8815
Epoch 164/500
10/10 [=====] - 0s 4ms/step - loss: 1352.3486 -
mse: 1352.3486 - val_loss: 885.7129 - val_mse: 885.7129
Epoch 165/500
10/10 [=====] - 0s 3ms/step - loss: 1352.5852 -
mse: 1352.5852 - val_loss: 884.2549 - val_mse: 884.2549
Epoch 166/500
10/10 [=====] - 0s 4ms/step - loss: 1383.3458 -
mse: 1383.3458 - val_loss: 861.0209 - val_mse: 861.0209
Epoch 167/500
10/10 [=====] - 0s 3ms/step - loss: 1233.0540 -
mse: 1233.0540 - val_loss: 845.3071 - val_mse: 845.3070
Epoch 168/500
10/10 [=====] - 0s 3ms/step - loss: 1316.9757 -
mse: 1316.9757 - val_loss: 860.9841 - val_mse: 860.9841
Epoch 169/500
10/10 [=====] - 0s 4ms/step - loss: 1242.9202 -
mse: 1242.9202 - val_loss: 875.6343 - val_mse: 875.6343
Epoch 170/500
10/10 [=====] - 0s 4ms/step - loss: 1447.0190 -
mse: 1447.0190 - val_loss: 905.5622 - val_mse: 905.5622
Epoch 171/500
10/10 [=====] - 0s 3ms/step - loss: 1388.5140 -
mse: 1388.5140 - val_loss: 909.6386 - val_mse: 909.6386
Epoch 172/500
10/10 [=====] - 0s 3ms/step - loss: 1152.2657 -
mse: 1152.2655 - val_loss: 890.7497 - val_mse: 890.7497
Epoch 173/500
10/10 [=====] - 0s 3ms/step - loss: 1249.5753 -
mse: 1249.5753 - val_loss: 876.5150 - val_mse: 876.5149
Epoch 174/500
10/10 [=====] - 0s 3ms/step - loss: 1459.0714 -
mse: 1459.0714 - val_loss: 878.5928 - val_mse: 878.5928
Epoch 175/500
10/10 [=====] - 0s 3ms/step - loss: 1339.4919 -
mse: 1339.4919 - val_loss: 896.9111 - val_mse: 896.9111
Epoch 176/500
10/10 [=====] - 0s 4ms/step - loss: 1385.0999 -
mse: 1385.0999 - val_loss: 892.0883 - val_mse: 892.0883
Epoch 177/500
10/10 [=====] - 0s 3ms/step - loss: 1265.0493 -
mse: 1265.0493 - val_loss: 871.9827 - val_mse: 871.9827
Epoch 178/500
10/10 [=====] - 0s 3ms/step - loss: 1298.9851 -
mse: 1298.9851 - val_loss: 896.0568 - val_mse: 896.0568
Epoch 179/500
10/10 [=====] - 0s 3ms/step - loss: 1326.9996 -
mse: 1326.9996 - val_loss: 883.8196 - val_mse: 883.8197
```



Epoch 180/500  
10/10 [=====] - 0s 3ms/step - loss: 1374.6691 -  
mse: 1374.6691 - val\_loss: 867.3156 - val\_mse: 867.3157  
Epoch 181/500  
10/10 [=====] - 0s 3ms/step - loss: 1558.8361 -  
mse: 1558.8361 - val\_loss: 855.7555 - val\_mse: 855.7555  
Epoch 182/500  
10/10 [=====] - 0s 4ms/step - loss: 1439.6289 -  
mse: 1439.6289 - val\_loss: 861.9581 - val\_mse: 861.9581  
Epoch 183/500  
10/10 [=====] - 0s 3ms/step - loss: 1302.5295 -  
mse: 1302.5295 - val\_loss: 869.3503 - val\_mse: 869.3503  
Epoch 184/500  
10/10 [=====] - 0s 3ms/step - loss: 1422.5402 -  
mse: 1422.5402 - val\_loss: 857.8502 - val\_mse: 857.8503  
Epoch 185/500  
10/10 [=====] - 0s 4ms/step - loss: 1315.0216 -  
mse: 1315.0216 - val\_loss: 862.6243 - val\_mse: 862.6243  
Epoch 186/500  
10/10 [=====] - 0s 3ms/step - loss: 1296.9012 -  
mse: 1296.9012 - val\_loss: 867.5463 - val\_mse: 867.5463  
Epoch 187/500  
10/10 [=====] - 0s 3ms/step - loss: 1504.5354 -  
mse: 1504.5354 - val\_loss: 886.3314 - val\_mse: 886.3314  
Epoch 188/500  
10/10 [=====] - 0s 3ms/step - loss: 1479.4441 -  
mse: 1479.4441 - val\_loss: 903.4374 - val\_mse: 903.4375  
Epoch 189/500  
10/10 [=====] - 0s 4ms/step - loss: 1344.3164 -  
mse: 1344.3164 - val\_loss: 894.2666 - val\_mse: 894.2666  
Epoch 190/500  
10/10 [=====] - 0s 3ms/step - loss: 1572.4877 -  
mse: 1572.4877 - val\_loss: 882.6621 - val\_mse: 882.6621  
Epoch 191/500  
10/10 [=====] - 0s 3ms/step - loss: 1507.2208 -  
mse: 1507.2208 - val\_loss: 867.5823 - val\_mse: 867.5823  
Epoch 192/500  
10/10 [=====] - 0s 3ms/step - loss: 1386.7654 -  
mse: 1386.7654 - val\_loss: 868.7402 - val\_mse: 868.7402  
Epoch 193/500  
10/10 [=====] - 0s 4ms/step - loss: 1275.4830 -  
mse: 1275.4832 - val\_loss: 860.8688 - val\_mse: 860.8688  
Epoch 194/500  
10/10 [=====] - 0s 3ms/step - loss: 1251.3755 -  
mse: 1251.3755 - val\_loss: 868.5746 - val\_mse: 868.5746  
Epoch 195/500  
10/10 [=====] - 0s 3ms/step - loss: 1254.7910 -  
mse: 1254.7910 - val\_loss: 871.3702 - val\_mse: 871.3702  
Epoch 196/500  
10/10 [=====] - 0s 3ms/step - loss: 1316.7433 -  
mse: 1316.7432 - val\_loss: 870.5876 - val\_mse: 870.5876  
Epoch 197/500  
10/10 [=====] - 0s 3ms/step - loss: 1188.2527 -  
mse: 1188.2527 - val\_loss: 862.9415 - val\_mse: 862.9415  
Epoch 198/500  
10/10 [=====] - 0s 4ms/step - loss: 1401.1288 -  
mse: 1401.1288 - val\_loss: 855.9550 - val\_mse: 855.9550  
Epoch 199/500  
10/10 [=====] - 0s 3ms/step - loss: 1342.7401 -  
mse: 1342.7401 - val\_loss: 867.8028 - val\_mse: 867.8028  
Epoch 200/500

10/10 [=====] - 0s 3ms/step - loss: 1163.7144 -  
mse: 1163.7144 - val\_loss: 864.8398 - val\_mse: 864.8398  
Epoch 201/500  
10/10 [=====] - 0s 3ms/step - loss: 1339.8873 -  
mse: 1339.8873 - val\_loss: 860.2594 - val\_mse: 860.2594  
Epoch 202/500  
10/10 [=====] - 0s 3ms/step - loss: 1223.8658 -  
mse: 1223.8658 - val\_loss: 869.2097 - val\_mse: 869.2098  
Epoch 203/500  
10/10 [=====] - 0s 3ms/step - loss: 1209.3794 -  
mse: 1209.3794 - val\_loss: 863.1144 - val\_mse: 863.1144  
Epoch 204/500  
10/10 [=====] - 0s 3ms/step - loss: 1019.3250 -  
mse: 1019.3250 - val\_loss: 855.1335 - val\_mse: 855.1335  
Epoch 205/500  
10/10 [=====] - 0s 4ms/step - loss: 1351.8086 -  
mse: 1351.8086 - val\_loss: 851.9599 - val\_mse: 851.9599  
Epoch 206/500  
10/10 [=====] - 0s 4ms/step - loss: 1185.7971 -  
mse: 1185.7971 - val\_loss: 848.8350 - val\_mse: 848.8350  
Epoch 207/500  
10/10 [=====] - 0s 3ms/step - loss: 1452.3344 -  
mse: 1452.3344 - val\_loss: 855.2585 - val\_mse: 855.2585  
Epoch 208/500  
10/10 [=====] - 0s 4ms/step - loss: 1361.8721 -  
mse: 1361.8721 - val\_loss: 861.7148 - val\_mse: 861.7148  
Epoch 209/500  
10/10 [=====] - 0s 3ms/step - loss: 1462.9761 -  
mse: 1462.9761 - val\_loss: 865.3972 - val\_mse: 865.3972  
Epoch 210/500  
10/10 [=====] - 0s 4ms/step - loss: 1257.7411 -  
mse: 1257.7411 - val\_loss: 852.7991 - val\_mse: 852.7991  
Epoch 211/500  
10/10 [=====] - 0s 4ms/step - loss: 1280.5521 -  
mse: 1280.5521 - val\_loss: 840.0846 - val\_mse: 840.0846  
Epoch 212/500  
10/10 [=====] - 0s 3ms/step - loss: 1295.4407 -  
mse: 1295.4407 - val\_loss: 840.6210 - val\_mse: 840.6210  
Epoch 213/500  
10/10 [=====] - 0s 3ms/step - loss: 1190.5464 -  
mse: 1190.5464 - val\_loss: 830.2053 - val\_mse: 830.2053  
Epoch 214/500  
10/10 [=====] - 0s 3ms/step - loss: 1311.9160 -  
mse: 1311.9161 - val\_loss: 827.8940 - val\_mse: 827.8941  
Epoch 215/500  
10/10 [=====] - 0s 3ms/step - loss: 1255.1476 -  
mse: 1255.1476 - val\_loss: 825.0800 - val\_mse: 825.0800  
Epoch 216/500  
10/10 [=====] - 0s 3ms/step - loss: 1147.9735 -  
mse: 1147.9735 - val\_loss: 831.5011 - val\_mse: 831.5011  
Epoch 217/500  
10/10 [=====] - 0s 4ms/step - loss: 1329.0809 -  
mse: 1329.0809 - val\_loss: 870.5206 - val\_mse: 870.5206  
Epoch 218/500  
10/10 [=====] - 0s 3ms/step - loss: 1003.9725 -  
mse: 1003.9725 - val\_loss: 864.7944 - val\_mse: 864.7945  
Epoch 219/500  
10/10 [=====] - 0s 4ms/step - loss: 1371.3850 -  
mse: 1371.3850 - val\_loss: 847.4214 - val\_mse: 847.4213  
Epoch 220/500  
10/10 [=====] - 0s 3ms/step - loss: 1210.2960 -

```
mse: 1210.2960 - val_loss: 826.5558 - val_mse: 826.5558
Epoch 221/500
10/10 [=====] - 0s 3ms/step - loss: 1377.2032 -
mse: 1377.2032 - val_loss: 822.4355 - val_mse: 822.4355
Epoch 222/500
10/10 [=====] - 0s 3ms/step - loss: 1215.3501 -
mse: 1215.3501 - val_loss: 825.0261 - val_mse: 825.0261
Epoch 223/500
10/10 [=====] - 0s 4ms/step - loss: 1511.2577 -
mse: 1511.2577 - val_loss: 843.2322 - val_mse: 843.2322
Epoch 224/500
10/10 [=====] - 0s 3ms/step - loss: 1373.5980 -
mse: 1373.5980 - val_loss: 855.9205 - val_mse: 855.9205
Epoch 225/500
10/10 [=====] - 0s 3ms/step - loss: 1399.3063 -
mse: 1399.3063 - val_loss: 851.8068 - val_mse: 851.8067
Epoch 226/500
10/10 [=====] - 0s 3ms/step - loss: 1361.1022 -
mse: 1361.1022 - val_loss: 855.3065 - val_mse: 855.3065
Epoch 227/500
10/10 [=====] - 0s 3ms/step - loss: 1319.0980 -
mse: 1319.0980 - val_loss: 850.7313 - val_mse: 850.7313
Epoch 228/500
10/10 [=====] - 0s 4ms/step - loss: 1152.0831 -
mse: 1152.0834 - val_loss: 858.4952 - val_mse: 858.4952
Epoch 229/500
10/10 [=====] - 0s 4ms/step - loss: 1164.2443 -
mse: 1164.2443 - val_loss: 873.7361 - val_mse: 873.7361
Epoch 230/500
10/10 [=====] - 0s 4ms/step - loss: 1143.4404 -
mse: 1143.4404 - val_loss: 862.0007 - val_mse: 862.0007
Epoch 231/500
10/10 [=====] - 0s 3ms/step - loss: 1159.9283 -
mse: 1159.9283 - val_loss: 841.3090 - val_mse: 841.3090
Epoch 232/500
10/10 [=====] - 0s 3ms/step - loss: 1413.9930 -
mse: 1413.9930 - val_loss: 831.0272 - val_mse: 831.0272
Epoch 233/500
10/10 [=====] - 0s 4ms/step - loss: 1302.8505 -
mse: 1302.8505 - val_loss: 841.2010 - val_mse: 841.2010
Epoch 234/500
10/10 [=====] - 0s 4ms/step - loss: 1195.3823 -
mse: 1195.3823 - val_loss: 845.6125 - val_mse: 845.6125
Epoch 235/500
10/10 [=====] - 0s 4ms/step - loss: 1220.6643 -
mse: 1220.6643 - val_loss: 853.8000 - val_mse: 853.8000
Epoch 236/500
10/10 [=====] - 0s 3ms/step - loss: 1342.1431 -
mse: 1342.1429 - val_loss: 865.1339 - val_mse: 865.1339
Epoch 237/500
10/10 [=====] - 0s 3ms/step - loss: 1396.1638 -
mse: 1396.1638 - val_loss: 858.6710 - val_mse: 858.6710
Epoch 238/500
10/10 [=====] - 0s 3ms/step - loss: 1174.6650 -
mse: 1174.6650 - val_loss: 847.6964 - val_mse: 847.6964
Epoch 239/500
10/10 [=====] - 0s 3ms/step - loss: 1180.6395 -
mse: 1180.6395 - val_loss: 842.6660 - val_mse: 842.6660
Epoch 240/500
10/10 [=====] - 0s 3ms/step - loss: 1190.4381 -
mse: 1190.4381 - val_loss: 836.7794 - val_mse: 836.7794
```

Epoch 241/500  
10/10 [=====] - 0s 3ms/step - loss: 1281.0610 -  
mse: 1281.0610 - val\_loss: 849.2946 - val\_mse: 849.2946  
Epoch 242/500  
10/10 [=====] - 0s 3ms/step - loss: 1188.5765 -  
mse: 1188.5765 - val\_loss: 867.5338 - val\_mse: 867.5338  
Epoch 243/500  
10/10 [=====] - 0s 3ms/step - loss: 1293.9366 -  
mse: 1293.9366 - val\_loss: 864.8455 - val\_mse: 864.8456  
Epoch 244/500  
10/10 [=====] - 0s 3ms/step - loss: 1317.6503 -  
mse: 1317.6503 - val\_loss: 862.0087 - val\_mse: 862.0087  
Epoch 245/500  
10/10 [=====] - 0s 3ms/step - loss: 1244.4012 -  
mse: 1244.4012 - val\_loss: 861.5791 - val\_mse: 861.5791  
Epoch 246/500  
10/10 [=====] - 0s 3ms/step - loss: 1265.8544 -  
mse: 1265.8544 - val\_loss: 870.3431 - val\_mse: 870.3431  
Epoch 247/500  
10/10 [=====] - 0s 3ms/step - loss: 1175.0448 -  
mse: 1175.0448 - val\_loss: 854.2028 - val\_mse: 854.2028  
Epoch 248/500  
10/10 [=====] - 0s 4ms/step - loss: 1127.2874 -  
mse: 1127.2875 - val\_loss: 848.3626 - val\_mse: 848.3626  
Epoch 249/500  
10/10 [=====] - 0s 3ms/step - loss: 1370.5411 -  
mse: 1370.5411 - val\_loss: 852.5035 - val\_mse: 852.5035  
Epoch 250/500  
10/10 [=====] - 0s 3ms/step - loss: 928.0772 -  
mse: 928.0772 - val\_loss: 841.5650 - val\_mse: 841.5649  
Epoch 251/500  
10/10 [=====] - 0s 4ms/step - loss: 1287.8813 -  
mse: 1287.8813 - val\_loss: 834.6448 - val\_mse: 834.6447  
Epoch 252/500  
10/10 [=====] - 0s 3ms/step - loss: 1326.9921 -  
mse: 1326.9921 - val\_loss: 824.6928 - val\_mse: 824.6928  
Epoch 253/500  
10/10 [=====] - 0s 3ms/step - loss: 1326.9996 -  
mse: 1326.9996 - val\_loss: 832.4226 - val\_mse: 832.4226  
Epoch 254/500  
10/10 [=====] - 0s 4ms/step - loss: 1279.6475 -  
mse: 1279.6475 - val\_loss: 846.8766 - val\_mse: 846.8766  
Epoch 255/500  
10/10 [=====] - 0s 4ms/step - loss: 1202.6486 -  
mse: 1202.6486 - val\_loss: 842.2457 - val\_mse: 842.2457  
Epoch 256/500  
10/10 [=====] - 0s 3ms/step - loss: 1059.6678 -  
mse: 1059.6678 - val\_loss: 832.1921 - val\_mse: 832.1920  
Epoch 257/500  
10/10 [=====] - 0s 3ms/step - loss: 1224.0874 -  
mse: 1224.0874 - val\_loss: 829.1927 - val\_mse: 829.1927  
Epoch 258/500  
10/10 [=====] - 0s 3ms/step - loss: 1045.0554 -  
mse: 1045.0554 - val\_loss: 829.4417 - val\_mse: 829.4417  
Epoch 259/500  
10/10 [=====] - 0s 3ms/step - loss: 1190.7587 -  
mse: 1190.7587 - val\_loss: 835.0453 - val\_mse: 835.0453  
Epoch 260/500  
10/10 [=====] - 0s 3ms/step - loss: 1261.8019 -  
mse: 1261.8019 - val\_loss: 829.3152 - val\_mse: 829.3152  
Epoch 261/500

10/10 [=====] - 0s 4ms/step - loss: 1335.2837 -  
mse: 1335.2837 - val\_loss: 813.1221 - val\_mse: 813.1221  
Epoch 262/500  
10/10 [=====] - 0s 3ms/step - loss: 1306.9502 -  
mse: 1306.9502 - val\_loss: 801.4858 - val\_mse: 801.4858  
Epoch 263/500  
10/10 [=====] - 0s 3ms/step - loss: 1124.2382 -  
mse: 1124.2382 - val\_loss: 809.5982 - val\_mse: 809.5983  
Epoch 264/500  
10/10 [=====] - 0s 3ms/step - loss: 1156.9906 -  
mse: 1156.9906 - val\_loss: 826.6782 - val\_mse: 826.6782  
Epoch 265/500  
10/10 [=====] - 0s 3ms/step - loss: 1183.1121 -  
mse: 1183.1121 - val\_loss: 821.8893 - val\_mse: 821.8893  
Epoch 266/500  
10/10 [=====] - 0s 3ms/step - loss: 1261.7040 -  
mse: 1261.7040 - val\_loss: 818.4193 - val\_mse: 818.4193  
Epoch 267/500  
10/10 [=====] - 0s 3ms/step - loss: 1258.7502 -  
mse: 1258.7502 - val\_loss: 815.9050 - val\_mse: 815.9049  
Epoch 268/500  
10/10 [=====] - 0s 3ms/step - loss: 1278.9153 -  
mse: 1278.9152 - val\_loss: 820.1682 - val\_mse: 820.1682  
Epoch 269/500  
10/10 [=====] - 0s 3ms/step - loss: 1110.6006 -  
mse: 1110.6006 - val\_loss: 825.6319 - val\_mse: 825.6319  
Epoch 270/500  
10/10 [=====] - 0s 4ms/step - loss: 1260.1766 -  
mse: 1260.1766 - val\_loss: 827.6699 - val\_mse: 827.6699  
Epoch 271/500  
10/10 [=====] - 0s 3ms/step - loss: 1298.0310 -  
mse: 1298.0310 - val\_loss: 836.5291 - val\_mse: 836.5291  
Epoch 272/500  
10/10 [=====] - 0s 3ms/step - loss: 1173.5892 -  
mse: 1173.5892 - val\_loss: 831.5912 - val\_mse: 831.5912  
Epoch 273/500  
10/10 [=====] - 0s 4ms/step - loss: 1340.1892 -  
mse: 1340.1892 - val\_loss: 833.4030 - val\_mse: 833.4030  
Epoch 274/500  
10/10 [=====] - 0s 3ms/step - loss: 1023.6900 -  
mse: 1023.6900 - val\_loss: 837.1066 - val\_mse: 837.1066  
Epoch 275/500  
10/10 [=====] - 0s 3ms/step - loss: 1246.8879 -  
mse: 1246.8881 - val\_loss: 840.0847 - val\_mse: 840.0847  
Epoch 276/500  
10/10 [=====] - 0s 3ms/step - loss: 1228.7980 -  
mse: 1228.7980 - val\_loss: 841.7810 - val\_mse: 841.7810  
Epoch 277/500  
10/10 [=====] - 0s 3ms/step - loss: 1260.9452 -  
mse: 1260.9452 - val\_loss: 852.9122 - val\_mse: 852.9122  
Epoch 278/500  
10/10 [=====] - 0s 4ms/step - loss: 1171.2617 -  
mse: 1171.2617 - val\_loss: 859.6183 - val\_mse: 859.6183  
Epoch 279/500  
10/10 [=====] - 0s 4ms/step - loss: 1153.5492 -  
mse: 1153.5492 - val\_loss: 843.9161 - val\_mse: 843.9161  
Epoch 280/500  
10/10 [=====] - 0s 3ms/step - loss: 1238.8279 -  
mse: 1238.8279 - val\_loss: 825.9778 - val\_mse: 825.9778  
Epoch 281/500  
10/10 [=====] - 0s 3ms/step - loss: 1151.6793 -

mse: 1151.6793 - val\_loss: 820.2541 - val\_mse: 820.2541  
Epoch 282/500  
10/10 [=====] - 0s 3ms/step - loss: 1057.1432 -  
mse: 1057.1432 - val\_loss: 823.4752 - val\_mse: 823.4752  
Epoch 283/500  
10/10 [=====] - 0s 3ms/step - loss: 1216.0938 -  
mse: 1216.0936 - val\_loss: 838.4866 - val\_mse: 838.4867  
Epoch 284/500  
10/10 [=====] - 0s 3ms/step - loss: 1352.6813 -  
mse: 1352.6813 - val\_loss: 840.8395 - val\_mse: 840.8395  
Epoch 285/500  
10/10 [=====] - 0s 3ms/step - loss: 1100.9877 -  
mse: 1100.9877 - val\_loss: 829.7587 - val\_mse: 829.7588  
Epoch 286/500  
10/10 [=====] - 0s 4ms/step - loss: 1353.0990 -  
mse: 1353.0990 - val\_loss: 830.6356 - val\_mse: 830.6356  
Epoch 287/500  
10/10 [=====] - 0s 3ms/step - loss: 1137.6095 -  
mse: 1137.6095 - val\_loss: 830.8150 - val\_mse: 830.8151  
Epoch 288/500  
10/10 [=====] - 0s 3ms/step - loss: 1077.0940 -  
mse: 1077.0940 - val\_loss: 829.0135 - val\_mse: 829.0136  
Epoch 289/500  
10/10 [=====] - 0s 3ms/step - loss: 1146.0309 -  
mse: 1146.0309 - val\_loss: 813.4857 - val\_mse: 813.4857  
Epoch 290/500  
10/10 [=====] - 0s 3ms/step - loss: 1339.0360 -  
mse: 1339.0360 - val\_loss: 820.3376 - val\_mse: 820.3376  
Epoch 291/500  
10/10 [=====] - 0s 4ms/step - loss: 1153.4806 -  
mse: 1153.4806 - val\_loss: 832.6123 - val\_mse: 832.6123  
Epoch 292/500  
10/10 [=====] - 0s 4ms/step - loss: 1050.7019 -  
mse: 1050.7019 - val\_loss: 829.5646 - val\_mse: 829.5646  
Epoch 293/500  
10/10 [=====] - 0s 3ms/step - loss: 1056.8273 -  
mse: 1056.8273 - val\_loss: 820.6135 - val\_mse: 820.6135  
Epoch 294/500  
10/10 [=====] - 0s 3ms/step - loss: 1276.2838 -  
mse: 1276.2838 - val\_loss: 824.8275 - val\_mse: 824.8275  
Epoch 295/500  
10/10 [=====] - 0s 3ms/step - loss: 1157.8737 -  
mse: 1157.8737 - val\_loss: 828.8962 - val\_mse: 828.8962  
Epoch 296/500  
10/10 [=====] - 0s 4ms/step - loss: 1172.0887 -  
mse: 1172.0887 - val\_loss: 820.0857 - val\_mse: 820.0857  
Epoch 297/500  
10/10 [=====] - 0s 3ms/step - loss: 1303.7992 -  
mse: 1303.7992 - val\_loss: 822.0605 - val\_mse: 822.0605  
Epoch 298/500  
10/10 [=====] - 0s 4ms/step - loss: 1327.6718 -  
mse: 1327.6718 - val\_loss: 816.7233 - val\_mse: 816.7233  
Epoch 299/500  
10/10 [=====] - 0s 4ms/step - loss: 1366.3309 -  
mse: 1366.3309 - val\_loss: 798.6808 - val\_mse: 798.6808  
Epoch 300/500  
10/10 [=====] - 0s 4ms/step - loss: 1039.6008 -  
mse: 1039.6008 - val\_loss: 794.2091 - val\_mse: 794.2091  
Epoch 301/500  
10/10 [=====] - 0s 3ms/step - loss: 1039.4171 -  
mse: 1039.4171 - val\_loss: 794.9846 - val\_mse: 794.9846

Epoch 302/500  
10/10 [=====] - 0s 3ms/step - loss: 1314.6012 -  
mse: 1314.6012 - val\_loss: 797.7585 - val\_mse: 797.7585  
Epoch 303/500  
10/10 [=====] - 0s 3ms/step - loss: 998.8743 -  
mse: 998.8743 - val\_loss: 814.4571 - val\_mse: 814.4571  
Epoch 304/500  
10/10 [=====] - 0s 3ms/step - loss: 1354.2029 -  
mse: 1354.2029 - val\_loss: 820.5987 - val\_mse: 820.5987  
Epoch 305/500  
10/10 [=====] - 0s 3ms/step - loss: 1207.0583 -  
mse: 1207.0583 - val\_loss: 812.2078 - val\_mse: 812.2078  
Epoch 306/500  
10/10 [=====] - 0s 3ms/step - loss: 1158.9941 -  
mse: 1158.9941 - val\_loss: 816.6388 - val\_mse: 816.6388  
Epoch 307/500  
10/10 [=====] - 0s 3ms/step - loss: 1052.7490 -  
mse: 1052.7490 - val\_loss: 817.0644 - val\_mse: 817.0644  
Epoch 308/500  
10/10 [=====] - 0s 4ms/step - loss: 1213.0792 -  
mse: 1213.0792 - val\_loss: 805.3510 - val\_mse: 805.3510  
Epoch 309/500  
10/10 [=====] - 0s 3ms/step - loss: 1281.0632 -  
mse: 1281.0632 - val\_loss: 808.9374 - val\_mse: 808.9374  
Epoch 310/500  
10/10 [=====] - 0s 3ms/step - loss: 1332.5762 -  
mse: 1332.5762 - val\_loss: 814.0074 - val\_mse: 814.0074  
Epoch 311/500  
10/10 [=====] - 0s 4ms/step - loss: 1230.6361 -  
mse: 1230.6361 - val\_loss: 814.1874 - val\_mse: 814.1874  
Epoch 312/500  
10/10 [=====] - 0s 3ms/step - loss: 1221.6390 -  
mse: 1221.6390 - val\_loss: 816.8105 - val\_mse: 816.8105  
Epoch 313/500  
10/10 [=====] - 0s 4ms/step - loss: 1200.6006 -  
mse: 1200.6006 - val\_loss: 820.0698 - val\_mse: 820.0698  
Epoch 314/500  
10/10 [=====] - 0s 3ms/step - loss: 1082.6265 -  
mse: 1082.6265 - val\_loss: 802.6320 - val\_mse: 802.6320  
Epoch 315/500  
10/10 [=====] - 0s 3ms/step - loss: 1060.2323 -  
mse: 1060.2323 - val\_loss: 786.9466 - val\_mse: 786.9466  
Epoch 316/500  
10/10 [=====] - 0s 3ms/step - loss: 1095.5291 -  
mse: 1095.5291 - val\_loss: 787.2719 - val\_mse: 787.2719  
Epoch 317/500  
10/10 [=====] - 0s 4ms/step - loss: 1002.3761 -  
mse: 1002.3761 - val\_loss: 796.8747 - val\_mse: 796.8747  
Epoch 318/500  
10/10 [=====] - 0s 3ms/step - loss: 1191.3297 -  
mse: 1191.3297 - val\_loss: 806.7337 - val\_mse: 806.7337  
Epoch 319/500  
10/10 [=====] - 0s 4ms/step - loss: 1203.7147 -  
mse: 1203.7147 - val\_loss: 813.3934 - val\_mse: 813.3934  
Epoch 320/500  
10/10 [=====] - 0s 4ms/step - loss: 1184.3374 -  
mse: 1184.3374 - val\_loss: 805.4969 - val\_mse: 805.4968  
Epoch 321/500  
10/10 [=====] - 0s 4ms/step - loss: 1271.7708 -  
mse: 1271.7708 - val\_loss: 797.8563 - val\_mse: 797.8563  
Epoch 322/500

```
10/10 [=====] - 0s 4ms/step - loss: 1076.2130 -  
mse: 1076.2130 - val_loss: 800.5266 - val_mse: 800.5266  
Epoch 323/500  
10/10 [=====] - 0s 4ms/step - loss: 1357.1953 -  
mse: 1357.1953 - val_loss: 824.9630 - val_mse: 824.9630  
Epoch 324/500  
10/10 [=====] - 0s 4ms/step - loss: 1246.5920 -  
mse: 1246.5920 - val_loss: 845.5712 - val_mse: 845.5712  
Epoch 325/500  
10/10 [=====] - 0s 3ms/step - loss: 1411.5997 -  
mse: 1411.5997 - val_loss: 830.8689 - val_mse: 830.8689  
Epoch 326/500  
10/10 [=====] - 0s 4ms/step - loss: 1175.1978 -  
mse: 1175.1978 - val_loss: 813.3328 - val_mse: 813.3327  
Epoch 327/500  
10/10 [=====] - 0s 3ms/step - loss: 994.2802 -  
mse: 994.2802 - val_loss: 820.3597 - val_mse: 820.3597  
Epoch 328/500  
10/10 [=====] - 0s 3ms/step - loss: 1321.2168 -  
mse: 1321.2168 - val_loss: 806.9978 - val_mse: 806.9978  
Epoch 329/500  
10/10 [=====] - 0s 4ms/step - loss: 1209.3185 -  
mse: 1209.3185 - val_loss: 801.4709 - val_mse: 801.4709  
Epoch 330/500  
10/10 [=====] - 0s 4ms/step - loss: 1191.0791 -  
mse: 1191.0791 - val_loss: 819.8051 - val_mse: 819.8051  
Epoch 331/500  
10/10 [=====] - 0s 3ms/step - loss: 1062.7347 -  
mse: 1062.7347 - val_loss: 826.8831 - val_mse: 826.8831  
Epoch 332/500  
10/10 [=====] - 0s 4ms/step - loss: 1232.1384 -  
mse: 1232.1384 - val_loss: 812.3884 - val_mse: 812.3884  
Epoch 333/500  
10/10 [=====] - 0s 4ms/step - loss: 1055.9913 -  
mse: 1055.9913 - val_loss: 812.1691 - val_mse: 812.1691  
Epoch 334/500  
10/10 [=====] - 0s 3ms/step - loss: 1117.3418 -  
mse: 1117.3418 - val_loss: 808.3013 - val_mse: 808.3013  
Epoch 335/500  
10/10 [=====] - 0s 4ms/step - loss: 1184.5702 -  
mse: 1184.5702 - val_loss: 803.0842 - val_mse: 803.0842  
Epoch 336/500  
10/10 [=====] - 0s 4ms/step - loss: 1180.8801 -  
mse: 1180.8801 - val_loss: 803.8497 - val_mse: 803.8497  
Epoch 337/500  
10/10 [=====] - 0s 3ms/step - loss: 1203.1394 -  
mse: 1203.1394 - val_loss: 810.4517 - val_mse: 810.4517  
Epoch 338/500  
10/10 [=====] - 0s 4ms/step - loss: 1257.1722 -  
mse: 1257.1722 - val_loss: 818.6924 - val_mse: 818.6924  
Epoch 339/500  
10/10 [=====] - 0s 3ms/step - loss: 1315.2811 -  
mse: 1315.2811 - val_loss: 808.0102 - val_mse: 808.0102  
Epoch 340/500  
10/10 [=====] - 0s 4ms/step - loss: 1205.0730 -  
mse: 1205.0730 - val_loss: 798.3851 - val_mse: 798.3851  
Epoch 341/500  
10/10 [=====] - 0s 3ms/step - loss: 1201.2455 -  
mse: 1201.2455 - val_loss: 798.6164 - val_mse: 798.6164  
Epoch 342/500  
10/10 [=====] - 0s 4ms/step - loss: 1336.2716 -
```



```
mse: 1336.2716 - val_loss: 802.4638 - val_mse: 802.4638
Epoch 343/500
10/10 [=====] - 0s 3ms/step - loss: 1161.3898 -
mse: 1161.3898 - val_loss: 811.5505 - val_mse: 811.5505
Epoch 344/500
10/10 [=====] - 0s 4ms/step - loss: 996.8325 -
mse: 996.8325 - val_loss: 823.8195 - val_mse: 823.8196
Epoch 345/500
10/10 [=====] - 0s 3ms/step - loss: 1138.2850 -
mse: 1138.2850 - val_loss: 807.6110 - val_mse: 807.6110
Epoch 346/500
10/10 [=====] - 0s 4ms/step - loss: 1449.2290 -
mse: 1449.2290 - val_loss: 809.6674 - val_mse: 809.6674
Epoch 347/500
10/10 [=====] - 0s 3ms/step - loss: 1207.6294 -
mse: 1207.6294 - val_loss: 814.3858 - val_mse: 814.3857
Epoch 348/500
10/10 [=====] - 0s 3ms/step - loss: 1206.6893 -
mse: 1206.6893 - val_loss: 819.4108 - val_mse: 819.4108
Epoch 349/500
10/10 [=====] - 0s 3ms/step - loss: 1189.2942 -
mse: 1189.2942 - val_loss: 804.2780 - val_mse: 804.2780
Epoch 350/500
10/10 [=====] - 0s 3ms/step - loss: 1094.7075 -
mse: 1094.7075 - val_loss: 799.4223 - val_mse: 799.4223
Epoch 351/500
10/10 [=====] - 0s 3ms/step - loss: 1231.5222 -
mse: 1231.5222 - val_loss: 811.1283 - val_mse: 811.1283
Epoch 352/500
10/10 [=====] - 0s 4ms/step - loss: 1169.2552 -
mse: 1169.2552 - val_loss: 812.0147 - val_mse: 812.0147
Epoch 353/500
10/10 [=====] - 0s 3ms/step - loss: 1235.1083 -
mse: 1235.1083 - val_loss: 801.2874 - val_mse: 801.2873
Epoch 354/500
10/10 [=====] - 0s 3ms/step - loss: 1001.0513 -
mse: 1001.0513 - val_loss: 803.0843 - val_mse: 803.0843
Epoch 355/500
10/10 [=====] - 0s 4ms/step - loss: 1199.3776 -
mse: 1199.3777 - val_loss: 801.7519 - val_mse: 801.7519
Epoch 356/500
10/10 [=====] - 0s 3ms/step - loss: 1061.2872 -
mse: 1061.2872 - val_loss: 801.2396 - val_mse: 801.2396
Epoch 357/500
10/10 [=====] - 0s 3ms/step - loss: 1192.9622 -
mse: 1192.9622 - val_loss: 808.9018 - val_mse: 808.9018
Epoch 358/500
10/10 [=====] - 0s 3ms/step - loss: 1268.4240 -
mse: 1268.4240 - val_loss: 815.0911 - val_mse: 815.0911
Epoch 359/500
10/10 [=====] - 0s 3ms/step - loss: 1184.0792 -
mse: 1184.0792 - val_loss: 803.1102 - val_mse: 803.1102
Epoch 360/500
10/10 [=====] - 0s 4ms/step - loss: 1058.5814 -
mse: 1058.5814 - val_loss: 791.9011 - val_mse: 791.9011
Epoch 361/500
10/10 [=====] - 0s 3ms/step - loss: 1063.5259 -
mse: 1063.5259 - val_loss: 789.9473 - val_mse: 789.9473
Epoch 362/500
10/10 [=====] - 0s 3ms/step - loss: 1054.5519 -
mse: 1054.5519 - val_loss: 802.4183 - val_mse: 802.4184
```

Epoch 363/500  
10/10 [=====] - 0s 4ms/step - loss: 1219.8267 -  
mse: 1219.8267 - val\_loss: 820.2123 - val\_mse: 820.2123  
Epoch 364/500  
10/10 [=====] - 0s 3ms/step - loss: 1299.6559 -  
mse: 1299.6559 - val\_loss: 813.4269 - val\_mse: 813.4269  
Epoch 365/500  
10/10 [=====] - 0s 4ms/step - loss: 1155.9423 -  
mse: 1155.9423 - val\_loss: 821.0289 - val\_mse: 821.0289  
Epoch 366/500  
10/10 [=====] - 0s 3ms/step - loss: 1155.8665 -  
mse: 1155.8665 - val\_loss: 827.2766 - val\_mse: 827.2766  
Epoch 367/500  
10/10 [=====] - 0s 3ms/step - loss: 1064.1320 -  
mse: 1064.1320 - val\_loss: 818.2502 - val\_mse: 818.2502  
Epoch 368/500  
10/10 [=====] - 0s 4ms/step - loss: 1134.5988 -  
mse: 1134.5988 - val\_loss: 808.0295 - val\_mse: 808.0295  
Epoch 369/500  
10/10 [=====] - 0s 3ms/step - loss: 1139.8890 -  
mse: 1139.8890 - val\_loss: 806.7741 - val\_mse: 806.7741  
Epoch 370/500  
10/10 [=====] - 0s 7ms/step - loss: 1066.1418 -  
mse: 1066.1418 - val\_loss: 803.5637 - val\_mse: 803.5637  
Epoch 371/500  
10/10 [=====] - 0s 5ms/step - loss: 1217.4030 -  
mse: 1217.4030 - val\_loss: 806.9114 - val\_mse: 806.9114  
Epoch 372/500  
10/10 [=====] - 0s 5ms/step - loss: 1190.1543 -  
mse: 1190.1543 - val\_loss: 808.1813 - val\_mse: 808.1813  
Epoch 373/500  
10/10 [=====] - 0s 3ms/step - loss: 1133.5552 -  
mse: 1133.5552 - val\_loss: 805.8232 - val\_mse: 805.8232  
Epoch 374/500  
10/10 [=====] - 0s 7ms/step - loss: 1145.7202 -  
mse: 1145.7202 - val\_loss: 808.4034 - val\_mse: 808.4033  
Epoch 375/500  
10/10 [=====] - 0s 6ms/step - loss: 1114.9786 -  
mse: 1114.9786 - val\_loss: 807.0558 - val\_mse: 807.0558  
Epoch 376/500  
10/10 [=====] - 0s 8ms/step - loss: 1093.2220 -  
mse: 1093.2219 - val\_loss: 795.8323 - val\_mse: 795.8323  
Epoch 377/500  
10/10 [=====] - 0s 6ms/step - loss: 1213.8601 -  
mse: 1213.8601 - val\_loss: 805.2751 - val\_mse: 805.2751  
Epoch 378/500  
10/10 [=====] - 0s 4ms/step - loss: 1146.4760 -  
mse: 1146.4760 - val\_loss: 815.4200 - val\_mse: 815.4200  
Epoch 379/500  
10/10 [=====] - 0s 3ms/step - loss: 1110.9978 -  
mse: 1110.9978 - val\_loss: 818.1246 - val\_mse: 818.1246  
Epoch 380/500  
10/10 [=====] - 0s 3ms/step - loss: 1241.0819 -  
mse: 1241.0819 - val\_loss: 814.3586 - val\_mse: 814.3586  
Epoch 381/500  
10/10 [=====] - 0s 3ms/step - loss: 1185.2542 -  
mse: 1185.2542 - val\_loss: 815.9216 - val\_mse: 815.9216  
Epoch 382/500  
10/10 [=====] - 0s 3ms/step - loss: 1124.8364 -  
mse: 1124.8364 - val\_loss: 816.1571 - val\_mse: 816.1571  
Epoch 383/500

10/10 [=====] - 0s 3ms/step - loss: 1088.7362 -  
mse: 1088.7362 - val\_loss: 809.3951 - val\_mse: 809.3951  
Epoch 384/500  
10/10 [=====] - 0s 3ms/step - loss: 983.6995 -  
mse: 983.6995 - val\_loss: 790.4709 - val\_mse: 790.4709  
Epoch 385/500  
10/10 [=====] - 0s 3ms/step - loss: 1220.7457 -  
mse: 1220.7457 - val\_loss: 783.2112 - val\_mse: 783.2112  
Epoch 386/500  
10/10 [=====] - 0s 3ms/step - loss: 938.3348 -  
mse: 938.3348 - val\_loss: 787.4726 - val\_mse: 787.4726  
Epoch 387/500  
10/10 [=====] - 0s 3ms/step - loss: 1023.1074 -  
mse: 1023.1074 - val\_loss: 783.1712 - val\_mse: 783.1712  
Epoch 388/500  
10/10 [=====] - 0s 3ms/step - loss: 1162.6793 -  
mse: 1162.6793 - val\_loss: 785.3778 - val\_mse: 785.3778  
Epoch 389/500  
10/10 [=====] - 0s 3ms/step - loss: 1242.9272 -  
mse: 1242.9272 - val\_loss: 789.0985 - val\_mse: 789.0985  
Epoch 390/500  
10/10 [=====] - 0s 3ms/step - loss: 1029.1829 -  
mse: 1029.1829 - val\_loss: 807.5937 - val\_mse: 807.5937  
Epoch 391/500  
10/10 [=====] - 0s 4ms/step - loss: 1085.9567 -  
mse: 1085.9567 - val\_loss: 813.8329 - val\_mse: 813.8329  
Epoch 392/500  
10/10 [=====] - 0s 5ms/step - loss: 1194.8918 -  
mse: 1194.8918 - val\_loss: 813.2701 - val\_mse: 813.2701  
Epoch 393/500  
10/10 [=====] - 0s 4ms/step - loss: 1118.8864 -  
mse: 1118.8864 - val\_loss: 816.8326 - val\_mse: 816.8326  
Epoch 394/500  
10/10 [=====] - 0s 4ms/step - loss: 1156.2191 -  
mse: 1156.2191 - val\_loss: 817.6494 - val\_mse: 817.6494  
Epoch 395/500  
10/10 [=====] - 0s 4ms/step - loss: 1146.4380 -  
mse: 1146.4380 - val\_loss: 817.4178 - val\_mse: 817.4177  
Epoch 396/500  
10/10 [=====] - 0s 3ms/step - loss: 1195.0771 -  
mse: 1195.0771 - val\_loss: 801.3273 - val\_mse: 801.3273  
Epoch 397/500  
10/10 [=====] - 0s 3ms/step - loss: 1043.1863 -  
mse: 1043.1863 - val\_loss: 797.4997 - val\_mse: 797.4997  
Epoch 398/500  
10/10 [=====] - 0s 3ms/step - loss: 1058.5714 -  
mse: 1058.5714 - val\_loss: 796.9303 - val\_mse: 796.9304  
Epoch 399/500  
10/10 [=====] - 0s 3ms/step - loss: 973.2616 -  
mse: 973.2616 - val\_loss: 791.4570 - val\_mse: 791.4570  
Epoch 400/500  
10/10 [=====] - 0s 3ms/step - loss: 1078.3273 -  
mse: 1078.3273 - val\_loss: 789.6120 - val\_mse: 789.6119  
Epoch 401/500  
10/10 [=====] - 0s 4ms/step - loss: 1155.0522 -  
mse: 1155.0522 - val\_loss: 791.2770 - val\_mse: 791.2770  
Epoch 402/500  
10/10 [=====] - 0s 4ms/step - loss: 1125.3690 -  
mse: 1125.3690 - val\_loss: 797.8479 - val\_mse: 797.8479  
Epoch 403/500  
10/10 [=====] - 0s 3ms/step - loss: 1145.2904 -

mse: 1145.2905 - val\_loss: 798.4960 - val\_mse: 798.4960  
Epoch 404/500  
10/10 [=====] - 0s 3ms/step - loss: 976.9025 -  
mse: 976.9025 - val\_loss: 789.4398 - val\_mse: 789.4398  
Epoch 405/500  
10/10 [=====] - 0s 3ms/step - loss: 1176.8585 -  
mse: 1176.8585 - val\_loss: 781.3744 - val\_mse: 781.3744  
Epoch 406/500  
10/10 [=====] - 0s 3ms/step - loss: 1167.7886 -  
mse: 1167.7886 - val\_loss: 777.2293 - val\_mse: 777.2293  
Epoch 407/500  
10/10 [=====] - 0s 3ms/step - loss: 1214.5470 -  
mse: 1214.5470 - val\_loss: 772.9610 - val\_mse: 772.9610  
Epoch 408/500  
10/10 [=====] - 0s 3ms/step - loss: 1165.4738 -  
mse: 1165.4738 - val\_loss: 777.4131 - val\_mse: 777.4131  
Epoch 409/500  
10/10 [=====] - 0s 3ms/step - loss: 977.5445 -  
mse: 977.5445 - val\_loss: 788.3349 - val\_mse: 788.3349  
Epoch 410/500  
10/10 [=====] - 0s 3ms/step - loss: 1142.0365 -  
mse: 1142.0365 - val\_loss: 803.3785 - val\_mse: 803.3785  
Epoch 411/500  
10/10 [=====] - 0s 3ms/step - loss: 1145.3531 -  
mse: 1145.3531 - val\_loss: 795.9268 - val\_mse: 795.9268  
Epoch 412/500  
10/10 [=====] - 0s 3ms/step - loss: 1200.5378 -  
mse: 1200.5378 - val\_loss: 794.3070 - val\_mse: 794.3069  
Epoch 413/500  
10/10 [=====] - 0s 4ms/step - loss: 1131.7947 -  
mse: 1131.7947 - val\_loss: 800.1425 - val\_mse: 800.1425  
Epoch 414/500  
10/10 [=====] - 0s 3ms/step - loss: 1081.5817 -  
mse: 1081.5817 - val\_loss: 804.3916 - val\_mse: 804.3916  
Epoch 415/500  
10/10 [=====] - 0s 3ms/step - loss: 1232.0951 -  
mse: 1232.0951 - val\_loss: 808.3775 - val\_mse: 808.3775  
Epoch 416/500  
10/10 [=====] - 0s 5ms/step - loss: 964.2349 -  
mse: 964.2349 - val\_loss: 799.5624 - val\_mse: 799.5625  
Epoch 417/500  
10/10 [=====] - 0s 3ms/step - loss: 976.0324 -  
mse: 976.0324 - val\_loss: 794.0538 - val\_mse: 794.0538  
Epoch 418/500  
10/10 [=====] - 0s 3ms/step - loss: 1009.3166 -  
mse: 1009.3166 - val\_loss: 792.2978 - val\_mse: 792.2978  
Epoch 419/500  
10/10 [=====] - 0s 3ms/step - loss: 1130.5861 -  
mse: 1130.5861 - val\_loss: 789.8478 - val\_mse: 789.8478  
Epoch 420/500  
10/10 [=====] - 0s 3ms/step - loss: 1161.0481 -  
mse: 1161.0481 - val\_loss: 786.4928 - val\_mse: 786.4928  
Epoch 421/500  
10/10 [=====] - 0s 3ms/step - loss: 1133.1250 -  
mse: 1133.1250 - val\_loss: 795.1569 - val\_mse: 795.1569  
Epoch 422/500  
10/10 [=====] - 0s 3ms/step - loss: 1169.5471 -  
mse: 1169.5471 - val\_loss: 791.6471 - val\_mse: 791.6471  
Epoch 423/500  
10/10 [=====] - 0s 6ms/step - loss: 930.6017 -  
mse: 930.6016 - val\_loss: 787.2552 - val\_mse: 787.2553

Epoch 424/500  
10/10 [=====] - 0s 8ms/step - loss: 1122.6971 -  
mse: 1122.6973 - val\_loss: 779.5197 - val\_mse: 779.5197  
Epoch 425/500  
10/10 [=====] - 0s 8ms/step - loss: 1114.4113 -  
mse: 1114.4113 - val\_loss: 780.4168 - val\_mse: 780.4168  
Epoch 426/500  
10/10 [=====] - 0s 8ms/step - loss: 984.7107 -  
mse: 984.7107 - val\_loss: 781.7316 - val\_mse: 781.7315  
Epoch 427/500  
10/10 [=====] - 0s 11ms/step - loss: 1240.2795 -  
mse: 1240.2795 - val\_loss: 781.1065 - val\_mse: 781.1066  
Epoch 428/500  
10/10 [=====] - 0s 13ms/step - loss: 1161.2776 -  
mse: 1161.2776 - val\_loss: 786.1332 - val\_mse: 786.1332  
Epoch 429/500  
10/10 [=====] - 0s 8ms/step - loss: 1232.0874 -  
mse: 1232.0874 - val\_loss: 792.0220 - val\_mse: 792.0220  
Epoch 430/500  
10/10 [=====] - 0s 3ms/step - loss: 1192.5592 -  
mse: 1192.5592 - val\_loss: 786.6135 - val\_mse: 786.6135  
Epoch 431/500  
10/10 [=====] - 0s 5ms/step - loss: 1084.6805 -  
mse: 1084.6805 - val\_loss: 790.5133 - val\_mse: 790.5133  
Epoch 432/500  
10/10 [=====] - 0s 6ms/step - loss: 1202.0599 -  
mse: 1202.0599 - val\_loss: 808.2574 - val\_mse: 808.2573  
Epoch 433/500  
10/10 [=====] - 0s 3ms/step - loss: 1053.9030 -  
mse: 1053.9030 - val\_loss: 804.4003 - val\_mse: 804.4004  
Epoch 434/500  
10/10 [=====] - 0s 4ms/step - loss: 1101.4019 -  
mse: 1101.4019 - val\_loss: 803.1624 - val\_mse: 803.1624  
Epoch 435/500  
10/10 [=====] - 0s 3ms/step - loss: 981.4302 -  
mse: 981.4302 - val\_loss: 796.0095 - val\_mse: 796.0095  
Epoch 436/500  
10/10 [=====] - 0s 3ms/step - loss: 1164.5314 -  
mse: 1164.5314 - val\_loss: 790.0574 - val\_mse: 790.0574  
Epoch 437/500  
10/10 [=====] - 0s 3ms/step - loss: 1033.2937 -  
mse: 1033.2937 - val\_loss: 788.9647 - val\_mse: 788.9648  
Epoch 438/500  
10/10 [=====] - 0s 3ms/step - loss: 1328.4108 -  
mse: 1328.4108 - val\_loss: 800.1033 - val\_mse: 800.1033  
Epoch 439/500  
10/10 [=====] - 0s 3ms/step - loss: 1063.8362 -  
mse: 1063.8362 - val\_loss: 814.4783 - val\_mse: 814.4783  
Epoch 440/500  
10/10 [=====] - 0s 4ms/step - loss: 1138.3688 -  
mse: 1138.3688 - val\_loss: 810.5266 - val\_mse: 810.5267  
Epoch 441/500  
10/10 [=====] - 0s 3ms/step - loss: 1116.8839 -  
mse: 1116.8839 - val\_loss: 809.0814 - val\_mse: 809.0814  
Epoch 442/500  
10/10 [=====] - 0s 3ms/step - loss: 1121.9489 -  
mse: 1121.9489 - val\_loss: 797.3440 - val\_mse: 797.3440  
Epoch 443/500  
10/10 [=====] - 0s 3ms/step - loss: 1222.1353 -  
mse: 1222.1353 - val\_loss: 809.8318 - val\_mse: 809.8318  
Epoch 444/500

10/10 [=====] - 0s 3ms/step - loss: 1210.7750 -  
mse: 1210.7750 - val\_loss: 809.8658 - val\_mse: 809.8656  
Epoch 445/500  
10/10 [=====] - 0s 3ms/step - loss: 1168.1641 -  
mse: 1168.1641 - val\_loss: 801.2050 - val\_mse: 801.2050  
Epoch 446/500  
10/10 [=====] - 0s 3ms/step - loss: 957.4722 -  
mse: 957.4722 - val\_loss: 796.3691 - val\_mse: 796.3691  
Epoch 447/500  
10/10 [=====] - 0s 3ms/step - loss: 1253.4639 -  
mse: 1253.4639 - val\_loss: 785.2164 - val\_mse: 785.2164  
Epoch 448/500  
10/10 [=====] - 0s 3ms/step - loss: 1134.3217 -  
mse: 1134.3217 - val\_loss: 786.2103 - val\_mse: 786.2103  
Epoch 449/500  
10/10 [=====] - 0s 3ms/step - loss: 1166.6348 -  
mse: 1166.6348 - val\_loss: 788.1888 - val\_mse: 788.1888  
Epoch 450/500  
10/10 [=====] - 0s 3ms/step - loss: 1197.9979 -  
mse: 1197.9979 - val\_loss: 794.4749 - val\_mse: 794.4749  
Epoch 451/500  
10/10 [=====] - 0s 3ms/step - loss: 972.3656 -  
mse: 972.3656 - val\_loss: 798.4323 - val\_mse: 798.4323  
Epoch 452/500  
10/10 [=====] - 0s 3ms/step - loss: 1097.3334 -  
mse: 1097.3334 - val\_loss: 793.3473 - val\_mse: 793.3473  
Epoch 453/500  
10/10 [=====] - 0s 3ms/step - loss: 1080.7708 -  
mse: 1080.7708 - val\_loss: 792.4955 - val\_mse: 792.4955  
Epoch 454/500  
10/10 [=====] - 0s 3ms/step - loss: 1055.2426 -  
mse: 1055.2426 - val\_loss: 794.6151 - val\_mse: 794.6151  
Epoch 455/500  
10/10 [=====] - 0s 3ms/step - loss: 1165.9719 -  
mse: 1165.9719 - val\_loss: 806.7936 - val\_mse: 806.7936  
Epoch 456/500  
10/10 [=====] - 0s 3ms/step - loss: 1161.9626 -  
mse: 1161.9626 - val\_loss: 811.5147 - val\_mse: 811.5147  
Epoch 457/500  
10/10 [=====] - 0s 4ms/step - loss: 1324.6805 -  
mse: 1324.6805 - val\_loss: 808.2443 - val\_mse: 808.2443  
Epoch 458/500  
10/10 [=====] - 0s 5ms/step - loss: 1137.2461 -  
mse: 1137.2461 - val\_loss: 786.8232 - val\_mse: 786.8232  
Epoch 459/500  
10/10 [=====] - 0s 3ms/step - loss: 1020.2510 -  
mse: 1020.2509 - val\_loss: 781.9742 - val\_mse: 781.9742  
Epoch 460/500  
10/10 [=====] - 0s 3ms/step - loss: 1039.8047 -  
mse: 1039.8047 - val\_loss: 785.2715 - val\_mse: 785.2715  
Epoch 461/500  
10/10 [=====] - 0s 3ms/step - loss: 1260.5406 -  
mse: 1260.5405 - val\_loss: 792.9179 - val\_mse: 792.9179  
Epoch 462/500  
10/10 [=====] - 0s 3ms/step - loss: 1222.4116 -  
mse: 1222.4116 - val\_loss: 812.8984 - val\_mse: 812.8984  
Epoch 463/500  
10/10 [=====] - 0s 3ms/step - loss: 1156.8169 -  
mse: 1156.8169 - val\_loss: 818.9448 - val\_mse: 818.9448  
Epoch 464/500  
10/10 [=====] - 0s 3ms/step - loss: 1170.2874 -

mse: 1170.2874 - val\_loss: 815.9707 - val\_mse: 815.9707  
Epoch 465/500  
10/10 [=====] - 0s 4ms/step - loss: 1075.3651 -  
mse: 1075.3651 - val\_loss: 804.7527 - val\_mse: 804.7526  
Epoch 466/500  
10/10 [=====] - 0s 4ms/step - loss: 1047.0624 -  
mse: 1047.0624 - val\_loss: 794.8915 - val\_mse: 794.8917  
Epoch 467/500  
10/10 [=====] - 0s 3ms/step - loss: 1044.4875 -  
mse: 1044.4875 - val\_loss: 791.4354 - val\_mse: 791.4353  
Epoch 468/500  
10/10 [=====] - 0s 3ms/step - loss: 1201.2048 -  
mse: 1201.2048 - val\_loss: 790.7375 - val\_mse: 790.7375  
Epoch 469/500  
10/10 [=====] - 0s 3ms/step - loss: 1096.8907 -  
mse: 1096.8907 - val\_loss: 790.2315 - val\_mse: 790.2316  
Epoch 470/500  
10/10 [=====] - 0s 3ms/step - loss: 1005.1512 -  
mse: 1005.1512 - val\_loss: 792.1317 - val\_mse: 792.1317  
Epoch 471/500  
10/10 [=====] - 0s 3ms/step - loss: 1107.7635 -  
mse: 1107.7635 - val\_loss: 793.7138 - val\_mse: 793.7138  
Epoch 472/500  
10/10 [=====] - 0s 3ms/step - loss: 1246.3195 -  
mse: 1246.3195 - val\_loss: 818.2688 - val\_mse: 818.2688  
Epoch 473/500  
10/10 [=====] - 0s 3ms/step - loss: 1099.0110 -  
mse: 1099.0110 - val\_loss: 820.0930 - val\_mse: 820.0930  
Epoch 474/500  
10/10 [=====] - 0s 3ms/step - loss: 1081.6028 -  
mse: 1081.6028 - val\_loss: 813.3359 - val\_mse: 813.3360  
Epoch 475/500  
10/10 [=====] - 0s 3ms/step - loss: 1144.5924 -  
mse: 1144.5924 - val\_loss: 809.0876 - val\_mse: 809.0876  
Epoch 476/500  
10/10 [=====] - 0s 8ms/step - loss: 1088.8469 -  
mse: 1088.8469 - val\_loss: 805.6154 - val\_mse: 805.6154  
Epoch 477/500  
10/10 [=====] - 0s 4ms/step - loss: 1056.8949 -  
mse: 1056.8949 - val\_loss: 796.8518 - val\_mse: 796.8518  
Epoch 478/500  
10/10 [=====] - 0s 3ms/step - loss: 1093.0316 -  
mse: 1093.0316 - val\_loss: 791.3844 - val\_mse: 791.3844  
Epoch 479/500  
10/10 [=====] - 0s 3ms/step - loss: 1075.4176 -  
mse: 1075.4176 - val\_loss: 792.5369 - val\_mse: 792.5370  
Epoch 480/500  
10/10 [=====] - 0s 3ms/step - loss: 1040.8429 -  
mse: 1040.8429 - val\_loss: 799.0674 - val\_mse: 799.0674  
Epoch 481/500  
10/10 [=====] - 0s 3ms/step - loss: 1067.9944 -  
mse: 1067.9944 - val\_loss: 808.0246 - val\_mse: 808.0246  
Epoch 482/500  
10/10 [=====] - 0s 3ms/step - loss: 1075.4374 -  
mse: 1075.4374 - val\_loss: 804.6923 - val\_mse: 804.6922  
Epoch 483/500  
10/10 [=====] - 0s 3ms/step - loss: 1068.7610 -  
mse: 1068.7610 - val\_loss: 798.7229 - val\_mse: 798.7229  
Epoch 484/500  
10/10 [=====] - 0s 3ms/step - loss: 1096.5730 -  
mse: 1096.5730 - val\_loss: 800.5343 - val\_mse: 800.5343

Epoch 485/500  
10/10 [=====] - 0s 3ms/step - loss: 928.6865 -  
mse: 928.6865 - val\_loss: 806.6980 - val\_mse: 806.6980  
Epoch 486/500  
10/10 [=====] - 0s 3ms/step - loss: 1073.0360 -  
mse: 1073.0360 - val\_loss: 812.5322 - val\_mse: 812.5322  
Epoch 487/500  
10/10 [=====] - 0s 3ms/step - loss: 956.9052 -  
mse: 956.9052 - val\_loss: 815.7873 - val\_mse: 815.7873  
Epoch 488/500  
10/10 [=====] - 0s 3ms/step - loss: 953.1597 -  
mse: 953.1597 - val\_loss: 808.8151 - val\_mse: 808.8151  
Epoch 489/500  
10/10 [=====] - 0s 3ms/step - loss: 1139.2506 -  
mse: 1139.2506 - val\_loss: 809.1796 - val\_mse: 809.1796  
Epoch 490/500  
10/10 [=====] - 0s 3ms/step - loss: 1151.7269 -  
mse: 1151.7269 - val\_loss: 811.4813 - val\_mse: 811.4813  
Epoch 491/500  
10/10 [=====] - 0s 3ms/step - loss: 1162.4410 -  
mse: 1162.4409 - val\_loss: 810.0572 - val\_mse: 810.0572  
Epoch 492/500  
10/10 [=====] - 0s 4ms/step - loss: 1176.6395 -  
mse: 1176.6395 - val\_loss: 815.9011 - val\_mse: 815.9010  
Epoch 493/500  
10/10 [=====] - 0s 3ms/step - loss: 953.2958 -  
mse: 953.2958 - val\_loss: 808.7178 - val\_mse: 808.7178  
Epoch 494/500  
10/10 [=====] - 0s 3ms/step - loss: 977.4135 -  
mse: 977.4135 - val\_loss: 800.9415 - val\_mse: 800.9414  
Epoch 495/500  
10/10 [=====] - 0s 3ms/step - loss: 1046.8663 -  
mse: 1046.8663 - val\_loss: 803.9940 - val\_mse: 803.9940  
Epoch 496/500  
10/10 [=====] - 0s 3ms/step - loss: 1065.1947 -  
mse: 1065.1947 - val\_loss: 803.8033 - val\_mse: 803.8033  
Epoch 497/500  
10/10 [=====] - 0s 4ms/step - loss: 1172.2582 -  
mse: 1172.2582 - val\_loss: 806.2042 - val\_mse: 806.2042  
Epoch 498/500  
10/10 [=====] - 0s 3ms/step - loss: 991.2426 -  
mse: 991.2426 - val\_loss: 809.2444 - val\_mse: 809.2444  
Epoch 499/500  
10/10 [=====] - 0s 3ms/step - loss: 853.4010 -  
mse: 853.4010 - val\_loss: 807.4279 - val\_mse: 807.4279  
Epoch 500/500  
10/10 [=====] - 0s 4ms/step - loss: 951.5442 -  
mse: 951.5442 - val\_loss: 808.1580 - val\_mse: 808.1579  
Neural Network: MSE: 748.5630257841979, EV: 0.5421572205772132
