# Supplementary material for: Generation and validation of a formula to calculate hemoglobin loss on a cohort of healthy adults subjected to controlled blood loss
Source: Springer Nature journal article supplement (doi:10.1186/s12967-021-02783-9), 2021-03-20
Supplement: MOESM3 [file 12967_2021_2783_MOESM3_ESM.pdf]

# Blood loss prediction - Linear regression

## Import

```
In [1]: import pandas as pd
import numpy as np
from sklearn.model_selection import train_test_split, KFold
from sklearn.preprocessing import StandardScaler
from sklearn.metrics import mean_squared_error, mean_absolute_error, r2_score, explained_variance_score
import matplotlib.pyplot as plt
import seaborn as sn
import statsmodels.api as sm
import statsmodels.stats.api as sms
from statsmodels.compat import lzip
from statsmodels.stats.outliers_influence import variance_inflation_factor
from statsmodels.stats.stattools import durbin_watson
from statsmodels.formula.api import rlm, ols
from scipy import stats

import warnings
warnings.filterwarnings("ignore")
```

## Preprocessing

### Data import

```
In [2]: raw_data = pd.read_excel('Blood_loss_raw_data.xlsx')
raw_data['HB_diff'] = raw_data['HB_pre'] - raw_data['HB_post']
raw_data['BMI'] = raw_data['weight']/((raw_data['height']/100)**2)
raw_data.drop(['weight', 'height', 'BMI', 'age', 'HB_pre', 'HB_post', 'HB_diff', 'HCT_pre', 'HCT_post', 'BBS4PLT', 'BBS4LEUCO2', 'Nadler', 'VU_Eisen', 'VU_Ferritin', 'loss_eryl', 'loss_ml'], inplace=True, axis=1)
raw_data.dropna(inplace=True)
raw_data = raw_data.sample(frac=1).reset_index()
raw_data
```

```
Out[2]:
```

|  | index | sex | BBS1PLT | BBS1LEUCO | BV_HB | loss_g     |            |
|--|-------|-----|---------|-----------|-------|------------|------------|
|  | 0     | 301 | 1       | 246       | 6.62  | 116.790975 | 129.727883 |
|  | 1     | 275 | 1       | 210       | 9.95  | 133.369391 | 156.281122 |
|  | 2     | 251 | 1       | 227       | 5.32  | 141.550780 | 127.570047 |
|  | 3     | 247 | 1       | 237       | 5.15  | 121.227672 | 123.303421 |
|  | 4     | 175 | 1       | 314       | 6.66  | 159.419890 | 105.929284 |
|  | ...   | ... | ...     | ...       | ...   | ...        | ...        |

|     |     |   |     |      |            |            |
|-----|-----|---|-----|------|------------|------------|
| 397 | 374 | 1 | 199 | 5.10 | 176.670213 | 165.787588 |
| 398 | 63  | 1 | 257 | 7.15 | 174.006751 | 91.125000  |
| 399 | 320 | 1 | 242 | 8.11 | 203.046809 | 150.990991 |
| 400 | 123 | 1 | 214 | 4.28 | 132.056957 | 123.992195 |
| 401 | 386 | 1 | 293 | 3.81 | 169.899696 | 161.286377 |

402 rows x 6 columns

## Data transformations & visualizations

```
In [3]: # BV_HB
raw_data['BV_HB'].plot.hist(grid=True, bins=20, rwidth=0.9, color='#607c8e')
plt.title('Distribution of BV_HB')

# 95% value range
temp = list(raw_data['BV_HB'])
temp.sort()
print('Median: {} \n Mean: {}'.format(np.median(temp), np.mean(temp)))
print('95% of values between {} and {}'.format(temp[int(len(temp)*0.025)], temp[int(len(temp)*0.975)]))
```

Median: 128.27970536010002

Mean: 130.92171760715175

95% of values between 44.913212299999984 and 242.1822760048001

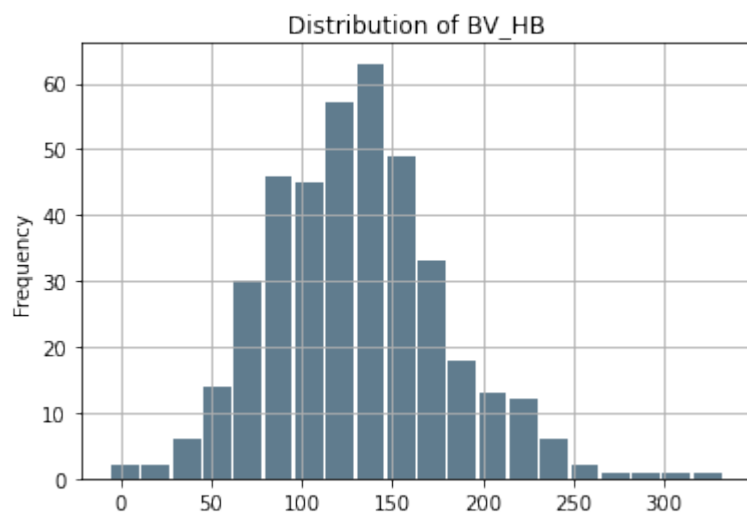

```
In [4]: # blood loss (g)
raw_data['loss_g'].plot.hist(grid=True, bins=20, rwidth=0.9, color='#607c8e')
plt.title('Distribution of loss_g')
```

Out[4]: Text(0.5, 1.0, 'Distribution of loss\_g')

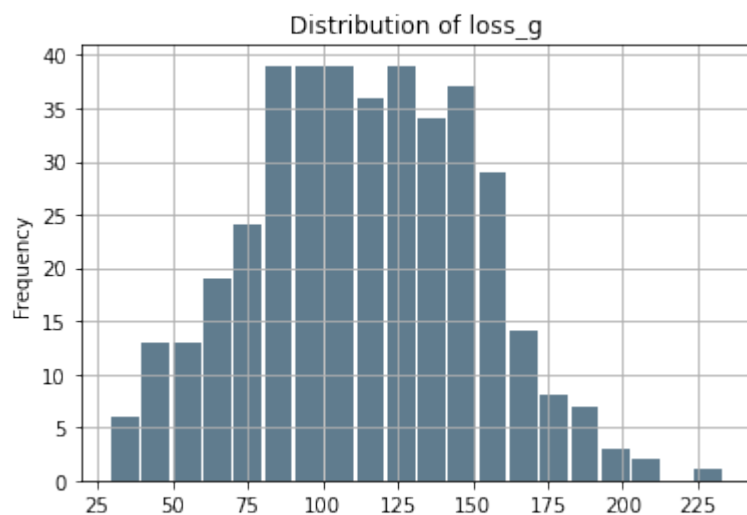

## Data transformations

```
In [5]: y = raw_data['loss_g']
X = raw_data.drop('loss_g', axis=1)

X_all = X[['sex', 'BV_HB']]
X_med = pd.DataFrame(X['BV_HB'])
```

## Correlation matrix

```
In [6]: X_temp = X[['BV_HB']]
X_temp['loss_g'] = y
cm = X_temp.corr()
sn.heatmap(cm, annot=True, cmap='Reds', fmt='.2g')
plt.show()
```

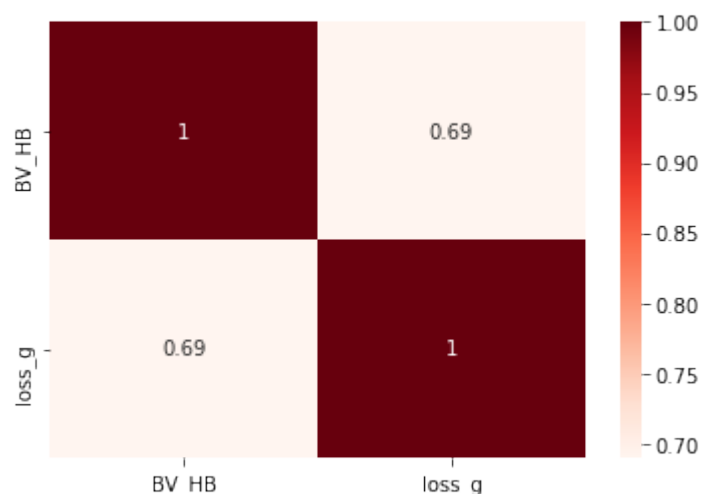

## Medical model

```
In [7]: #scaler = StandardScaler()
#X_med = scaler.fit_transform(X_med)
X_med2 = sm.add_constant(X_med)
est = sm.OLS(y, X_med2).fit()
print('Medical Model')
```

```
print(est.summary())
print('Condition number: {}'.format(est.condition_number))
```

Medical Model

### OLS Regression Results

```
=====
=====
Dep. Variable:          loss_g    R-squared:          0
.476
Model:                  OLS      Adj. R-squared:     0
.475
Method:                 Least Squares    F-statistic:        3
63.8
Date:                   Thu, 01 Oct 2020    Prob (F-statistic): 3.7
8e-58
Time:                   11:19:15    Log-Likelihood:     -18
92.3
No. Observations:      402    AIC:                3
789.
Df Residuals:          400    BIC:                37
97.
Df Model:               1
```

Covariance Type: nonrobust

```
=====
=====
              coef      std err          t      P>|t|      [0.025      0.
975]
```

```
-----
-----
const          45.7931      3.809      12.024      0.000      38.306      53
.280
BV_HB           0.5194      0.027      19.073      0.000      0.466      0
.573
```

```
=====
=====
Omnibus:          2.441    Durbin-Watson:      2
.125
Prob(Omnibus):    0.295    Jarque-Bera (JB):   2
.461
Skew:             0.057    Prob(JB):           0.
292
Kurtosis:         3.366    Cond. No.
398.
```

Warnings:

[1] Standard Errors assume that the covariance matrix of the errors is correctly specified.

Condition number: 397.62149457636224

## Linear regression model

```
In [8]: # condition number issues disappears once variables are scaled
#scaler = StandardScaler()
#X_all = scaler.fit_transform(X_all)
```

```
#X_all2 = sm.add_constant(X_all)
X_all2 = sm.add_constant(X_all)
est = sm.OLS(y, X_all2).fit()
print(est.summary())

# Mean absolute error
print('Mean absolute error: {}'.format(sum(abs(est.resid))/len(est.resid)))
```

OLS Regression Results

```
=====
=====
Dep. Variable:          loss_g      R-squared:          0
.532
Model:                  OLS        Adj. R-squared:     0
.530
Method:                 Least Squares  F-statistic:        2
26.6
Date:                   Thu, 01 Oct 2020  Prob (F-statistic): 1.7
4e-66
Time:                   11:19:15     Log-Likelihood:     -18
69.7
No. Observations:      402        AIC:                3
745.
Df Residuals:          399        BIC:                37
57.
Df Model:               2
```

Covariance Type: nonrobust

```
=====
=====
              coef      std err          t      P>|t|      [0.025      0.
975]
-----
const          42.2123      3.643      11.588      0.000      35.051      49
.374
sex            19.5549      2.842       6.881      0.000      13.968      25
.142
BV_HB           0.4505      0.028      16.291      0.000       0.396       0
.505
=====
=====
```

```
Omnibus:          13.294      Durbin-Watson:      2
.197
Prob(Omnibus):    0.001      Jarque-Bera (JB):   17
.111
Skew:             -0.307      Prob(JB):           0.00
0193
Kurtosis:         3.803      Cond. No.
408.
=====
=====
```

Warnings:

[1] Standard Errors assume that the covariance matrix of the errors is correctly specified.

Mean absolute error: 19.633425690017877

```
In [9]: plt.scatter(est.predict(X_all2), est.resid)
plt.title("Residuals vs. predicted HB loss")
plt.xlabel("predicted HB loss (g)")
plt.ylabel("Residuals")
plt.show()
```

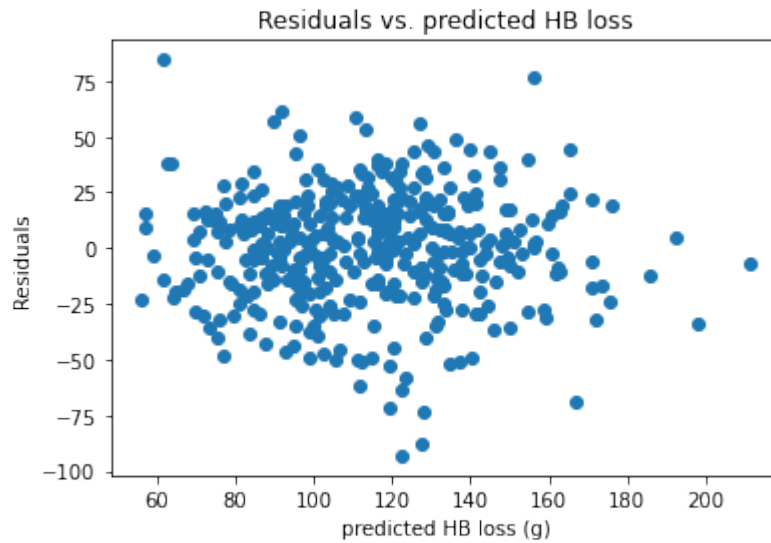

## Residual vs Fitted

```
In [10]: fig = sm.graphics.plot_partregress_grid(est)
fig.tight_layout(pad=1.0)
```

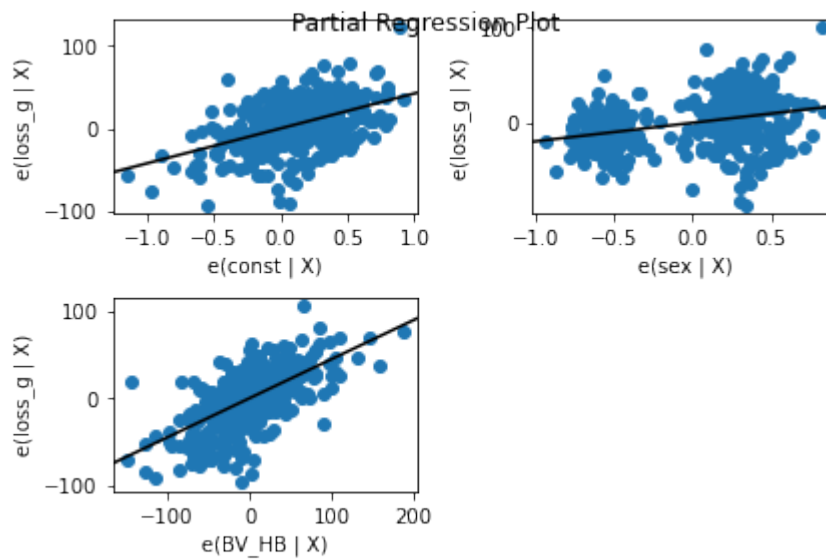

```
In [11]: fig = sm.graphics.plot_ccpr(est, 'BV_HB')
fig.tight_layout(pad=1.0)
```

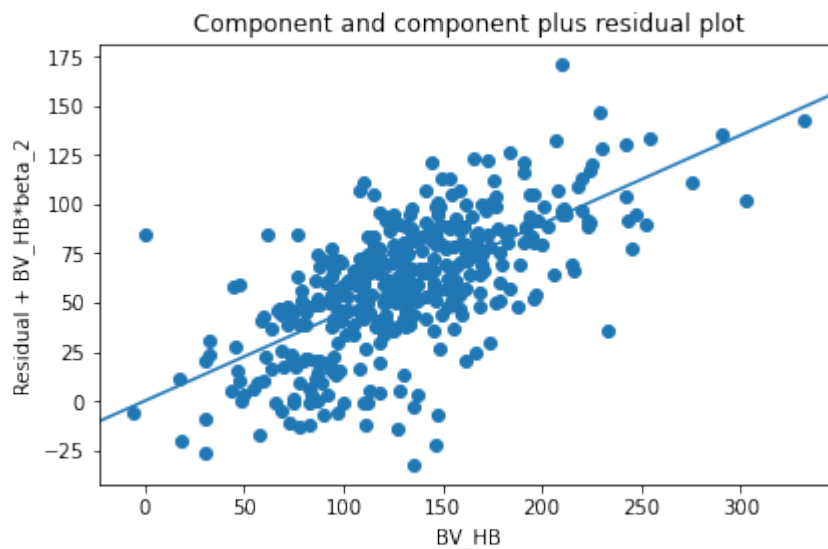

```
In [12]: name = ['Lagrange multiplier statistic', 'p-value',
                'f-value', 'f p-value']
test = sms.het_breuschpagan(est.resid, est.model.exog)
print('Homoscedasticity: \n {}'.format(zip(name, test)))
```

Homoscedasticity:

```
[('Lagrange multiplier statistic', 21.453052768590968), ('p-value', 2.1
95476441654187e-05), ('f-value', 11.246664986991272), ('f p-value', 1.77
15228558555995e-05)]
```

## Q-Q-Plot

```
In [13]: res = est.resid
fig = sm.qqplot(res, fit=True, line='45')
plt.title('QQ plot')
plt.show()
```

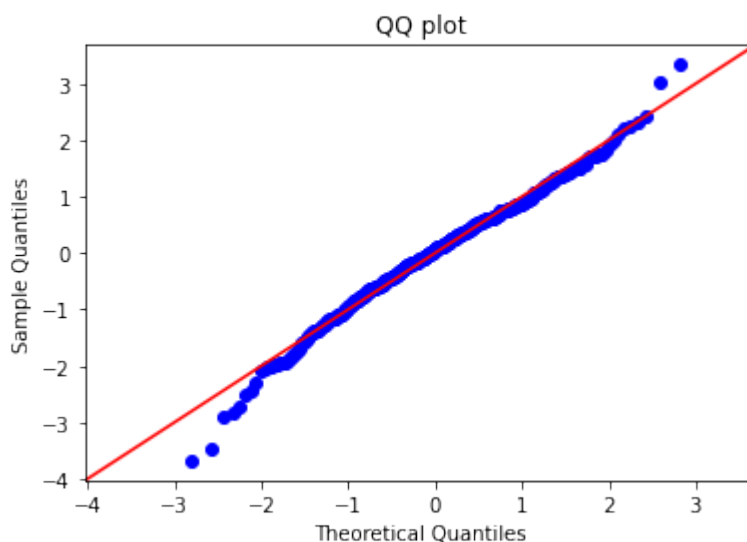

```
In [14]: name = ['Jarque-Bera', 'Chi^2 two-tail prob.', 'Skew', 'Kurtosis']
test = sms.jarque_bera(est.resid)
print('Normal distribution of errors result: \n {}'.format(zip(name, te
st)))
```

Normal distribution of errors result:

```
[('Jarque-Bera', 17.110707499444647), ('Chi^2 two-tail prob.', 0.000192
```

```
51167634807474), ('Skew', -0.3072131816742088), ('Kurtosis', 3.802505464223569)]
```

## Leverage-Resid2 Plot

```
In [15]: fig = sm.graphics.plot_leverage_resid2(est)
fig.tight_layout(pad=1.0)
```

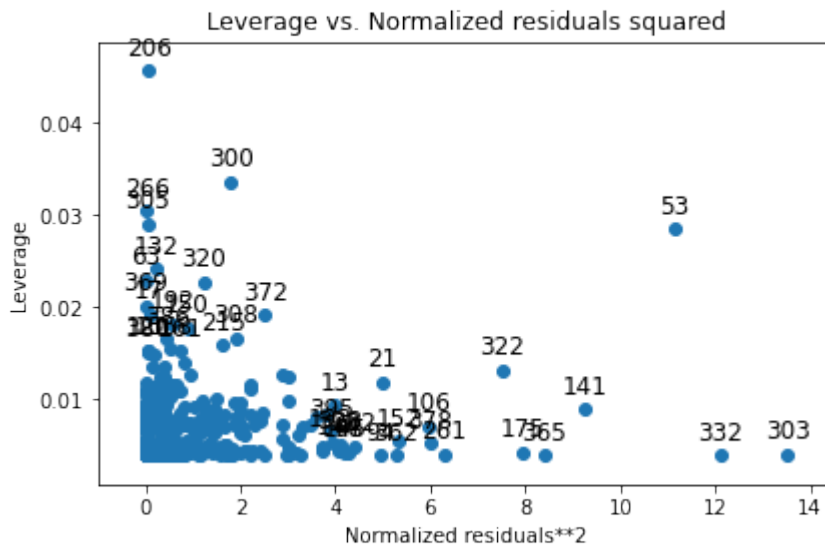

## Influence plot

```
In [16]: fig = sm.graphics.influence_plot(est)
fig.tight_layout(pad=0.0)
```

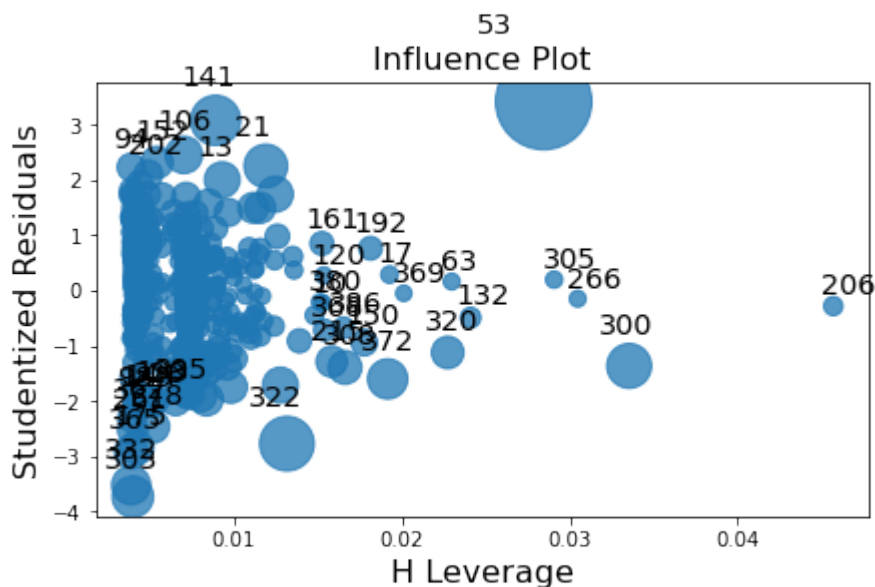

## Influence statistics

```
In [17]: influence = est.get_influence()
influence.summary_frame()
```

```
Out[17]:
```

---

| dfb_const | dfb_sex | dfb_BV_HB | cooks_d | standard_resid | hat_diag | dffits_internal | s |
|-----------|---------|-----------|---------|----------------|----------|-----------------|---|
|-----------|---------|-----------|---------|----------------|----------|-----------------|---|



|     |           |          |           |          |           |          |           |
|-----|-----------|----------|-----------|----------|-----------|----------|-----------|
| 0   | 0.014639  | 0.027456 | -0.018029 | 0.000582 | 0.604883  | 0.004747 | 0.041773  |
| 1   | 0.012960  | 0.052790 | -0.015961 | 0.002463 | 1.356685  | 0.003999 | 0.085961  |
| 2   | 0.000184  | 0.002850 | -0.000227 | 0.000008 | 0.080067  | 0.003869 | 0.004990  |
| 3   | 0.005529  | 0.011899 | -0.006809 | 0.000112 | 0.272801  | 0.004483 | 0.018306  |
| 4   | 0.014727  | -        | -0.018138 | 0.001645 | -1.089991 | 0.004137 | -0.070250 |
|     |           | 0.031177 |           |          |           |          |           |
| ... | ...       | ...      | ...       | ...      | ...       | ...      | ...       |
| 397 | -0.027722 | 0.020996 | 0.034143  | 0.001589 | 0.963122  | 0.005112 | 0.069035  |
| 398 | 0.051261  | -        | -0.063133 | 0.006153 | -1.933129 | 0.004915 | -0.135861 |
|     |           | 0.044326 |           |          |           |          |           |
| 399 | 0.004637  | -        | -0.005711 | 0.000021 | -0.088915 | 0.007963 | -0.007966 |
|     |           | 0.001013 |           |          |           |          |           |
| 400 | 0.001151  | 0.004234 | -0.001417 | 0.000016 | 0.107629  | 0.004034 | 0.006850  |
| 401 | -0.020634 | 0.022156 | 0.025412  | 0.001276 | 0.905700  | 0.004645 | 0.061871  |

402 rows x 9 columns

## Robust regression

```
In [18]: data_all = X_all2
data_all['blood_loss'] = y
```

```
In [19]: est_3 = ols('blood_loss ~ sex + BV_HB', data=data_all).fit(cov_type='HC3')
print(est_3.summary())
```

### OLS Regression Results

```
=====
=====
Dep. Variable:          blood_loss    R-squared:                0
.532
Model:                  OLS          Adj. R-squared:           0
.530
Method:                 Least Squares  F-statistic:             2
51.8
Date:                   Thu, 01 Oct 2020  Prob (F-statistic):      1.8
7e-71
Time:                   11:19:18      Log-Likelihood:         -18
69.7
No. Observations:      402          AIC:                     3
745.
Df Residuals:          399          BIC:                     37
57.
Df Model:               2
Covariance Type:      HC3

=====
=====
coef      std err          z      P>|z|      [0.025      0.
975]
```

```
-----
-----
Intercept      42.2123      3.668      11.509      0.000      35.024      49
.401
sex            19.5549      2.720      7.189      0.000      14.223      24
.886
BV_HB         0.4505      0.030      14.911      0.000      0.391      0
.510
=====
=====
Omnibus:                13.294   Durbin-Watson:                2
.197
Prob(Omnibus):          0.001   Jarque-Bera (JB):            17
.111
Skew:                   -0.307   Prob(JB):                     0.00
0193
Kurtosis:               3.803   Cond. No.
408.
=====
=====
```

Warnings:

[1] Standard Errors are heteroscedasticity robust (HC3)

```
In [20]: est_stable = rlm('blood_loss ~ sex + BV_HB', data=data_all, M=sm.robust
.norms.TukeyBiweight(3)).fit(conv='weights')
print(est_stable.summary())
```

Robust linear Model Regression Results

```
=====
=====
Dep. Variable:          blood_loss   No. Observations:
402
Model:                 RLM         Df Residuals:
399
Method:               IRLS        Df Model:
2
Norm:                 TukeyBiweight

Scale Est.:           mad

Cov Type:             H1

Date:                 Thu, 01 Oct 2020

Time:                 11:19:18

No. Iterations:      34

=====
=====
              coef      std err          z      P>|z|      [0.025      0.
975]
```

```
-----
-----
Intercept      43.7054      3.818      11.447      0.000      36.222      51
.189
sex            23.6331      2.979      7.934      0.000      17.795      29
.471
BV_HB         0.4367      0.029      15.067      0.000      0.380      0
```

```
.494
```

```
=====
=====
```

If the model instance has been used for another fit with different fit parameters, then the fit options might not be the correct ones anymore .

## Prediction interval

### Male patients

```
In [48]: lower = 0
         upper = 350

         BV_HB = np.arange(lower, upper)
         const = np.array([1.0]*(upper-lower))
         sex = np.array([1]*(upper-lower))

         df_male_pred = pd.DataFrame({'const': const, 'sex': sex, 'BV_HB': BV_HB
                                     })
```

```
In [50]: ci_interval = 0.9

         df_tot = X_all2
         df_tot['loss'] = y
         df_male = df_tot[df_tot['sex']==1]

         pred_male = est_3.get_prediction(df_male_pred)
         pred_male.summary_frame(alpha=1-ci_interval)
```

```
Out[50]:
```

|     | mean       | mean_se  | mean_ci_lower | mean_ci_upper | obs_ci_lower | obs_ci_upper |
|-----|------------|----------|---------------|---------------|--------------|--------------|
| 0   | 61.767283  | 4.975358 | 53.583547     | 69.951019     | 19.148601    | 104.385964   |
| 1   | 62.217798  | 4.947080 | 54.080576     | 70.355020     | 19.608024    | 104.827572   |
| 2   | 62.668313  | 4.918824 | 54.577567     | 70.759059     | 20.067390    | 105.269236   |
| 3   | 63.118828  | 4.890592 | 55.074519     | 71.163136     | 20.526700    | 105.710956   |
| 4   | 63.569343  | 4.862384 | 55.571432     | 71.567253     | 20.985954    | 106.152732   |
| ... | ...        | ...      | ...           | ...           | ...          | ...          |
| 345 | 217.194960 | 6.024088 | 207.286216    | 227.103703    | 174.211688   | 260.178232   |
| 346 | 217.645475 | 6.053010 | 207.689159    | 227.601790    | 174.651211   | 260.639738   |
| 347 | 218.095990 | 6.081944 | 208.092082    | 228.099897    | 175.090680   | 261.101299   |
| 348 | 218.546505 | 6.110890 | 208.494984    | 228.598025    | 175.530095   | 261.562915   |
| 349 | 218.997020 | 6.139849 | 208.897866    | 229.096173    | 175.969454   | 262.024585   |

350 rows x 6 columns

```
In [49]: ci_interval = 0.9

         df_tot = X_all2
         df_tot['loss'] = y
         df_male = df_tot[df_tot['sex']==1]
```

```

pred_male = est_3.get_prediction(df_male_pred)
pred_result_male = pred_male.summary_frame(alpha=1-ci_interval)

plt.scatter(df_male['BV_HB'], df_male['loss'])
plt.plot(pred_result_male['mean'], color='red', label = 'prediction')
plt.plot(pred_result_male['obs_ci_lower'], color='black', label = '90%
prediction interval')
plt.plot(pred_result_male['obs_ci_upper'], color='black')
plt.title("90% prediction interval for " + r"$\it{" + 'male' + "}" + "
patients")
plt.xlabel('Blood volume (Nadler) * HB_diff')
plt.ylabel('HB loss (g)')
plt.legend(loc="best")

```

Out[49]: <matplotlib.legend.Legend at 0x172d4f10>

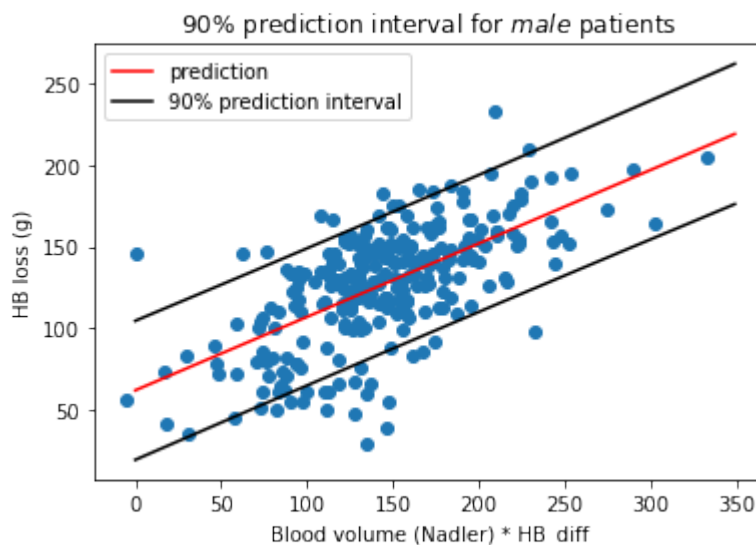

female patients

```

In [126]: lower = 0
upper = 250

BV_HB = np.arange(lower, upper)
const = np.array([1.0]*(upper-lower))
sex = np.array([0]*(upper-lower))

df_female_pred = pd.DataFrame({'const': const, 'sex': sex, 'BV_HB': BV_
HB})

```

```

In [127]: ci_interval = 0.9

df_tot = X_all2
df_tot['loss'] = y
df_female = df_tot[df_tot['sex']==0]

pred_female = est_3.get_prediction(df_female_pred)
pred_result_female = pred_female.summary_frame(alpha=1-ci_interval)

plt.scatter(df_female['BV_HB'], df_female['loss'])
plt.plot(pred_result_female['mean'], color='red', label = 'prediction')
plt.plot(pred_result_female['obs_ci_lower'], color='black', label = '90
% prediction interval')

```

```
plt.plot(pred_result_female['obs_ci_upper'], color='black')
plt.title("90% prediction interval for " + r"$\it{" + 'female' + "}" +
" patients")
plt.xlabel('Blood volume (Nadler) * HB_diff')
plt.ylabel('HB loss (g)')
plt.legend(loc="best")
```

Out[127]: <matplotlib.legend.Legend at 0x18c39700>

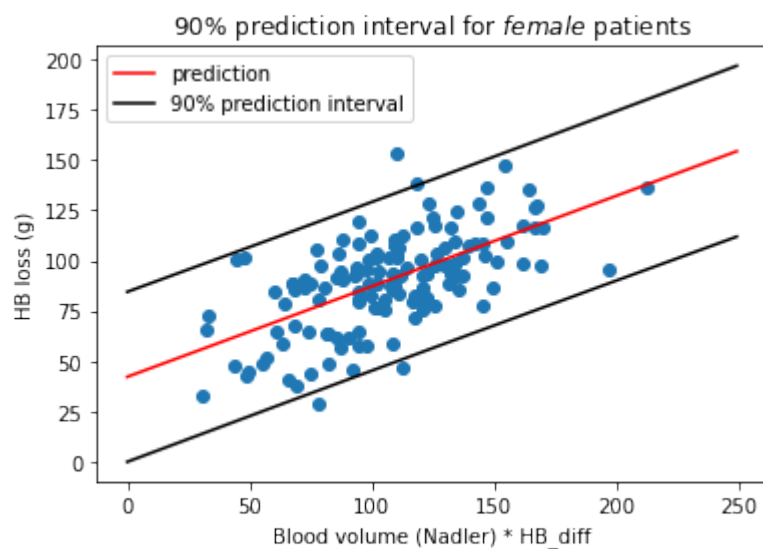

In [ ]:
