# Supplementary material for: Generation and validation of a formula to calculate hemoglobin loss on a cohort of healthy adults subjected to controlled blood loss
Source: J Transl Med. 2021 Mar 20;19:116. doi: 10.1186/s12967-021-02783-9 (PMC7981850; doi:10.1186/s12967-021-02783-9)
Supplement: Supplementary file 1 — Additional file 1. Excel worksheet for volume loss calculation. Values are pasted into the respective fields, ENTER calculates the incurred blood loss (mean, range). [file 12967_2021_2783_MOESM1_ESM.xlsx]

## Sheet: Hb loss prediction
	Hb loss prediction
		<-- please only fill out orange fields
	Parameters (DO NOT CHANGE)
	Parameter	male value	female value
	constant	61.7672	42.2123
	coefficient	0.4505
	constant HB_diff	0.6041	0.1833
	height^3	0.3669	0.3561
	weight	0.03219	0.03308
	Inverse covariance matrix (ICM)	1	2	3
	1	0.0205231	-0.00228723	-0.000126502
	2	-0.00228723	0.0124907	-4.39977e-05
	3	-0.000126502	-4.39977e-05	1.18276e-06
	x	1	0	20.5692
	x * ICM	0.017921	-0.00319223	-0.000102174
	x * ICM * x^T	0.0158194
	s^2	646.59
	t statistic	1.64868
	Hb loss calculation
	Parameter	Unit	Value
	sex		female	male	female
	height	meter	1.6
	weight	kg	54
	HB_pre	g/L	131
	HB_post	g/L	125
	Prediction interval		0.9
	Prediction lower bound	9.22554
	Mean prediction	51.4787	g HB loss
	Prediction upper bound	93.7319
